# Supplementary material for: Is the alcohol industry doing well by ‘doing good’? Findings from a content analysis of the alcohol industry’s actions to reduce harmful drinking
Source: PubMed Central journal article supplement — BMJ Open. 2018 Oct 24;8(10):e024325. doi: 10.1136/bmjopen-2018-024325 (PMC6224758; doi:10.1136/bmjopen-2018-024325), 2018-10-24
Supplement: bmjopen-2018-024325.draft_revisions.pdf [file bmjopen-2018-024325.draft_revisions.pdf]

# BMJ Open

BMJ Open is committed to open peer review. As part of this commitment we make the peer review history of every article we publish publicly available.

When an article is published we post the peer reviewers' comments and the authors' responses online. We also post the versions of the paper that were used during peer review. These are the versions that the peer review comments apply to.

The versions of the paper that follow are the versions that were submitted during the peer review process. They are not the versions of record or the final published versions. They should not be cited or distributed as the published version of this manuscript.

BMJ Open is an open access journal and the full, final, typeset and author-corrected version of record of the manuscript is available on our site with no access controls, subscription charges or pay-per-view fees (<http://bmjopen.bmj.com>).

If you have any questions on BMJ Open's open peer review process please email [info.bmjopen@bmj.com](mailto:info.bmjopen@bmj.com)

# BMJ Open

## Doing well by doing good: An empirical evaluation of the alcohol industry's "Actions to Reduce Harmful Drinking"

|                               |                                                                                                                                                                                                                                                        |
|-------------------------------|--------------------------------------------------------------------------------------------------------------------------------------------------------------------------------------------------------------------------------------------------------|
| Journal:                      | <i>BMJ Open</i>                                                                                                                                                                                                                                        |
| Manuscript ID                 | bmjopen-2018-024325                                                                                                                                                                                                                                    |
| Article Type:                 | Research                                                                                                                                                                                                                                               |
| Date Submitted by the Author: | 23-May-2018                                                                                                                                                                                                                                            |
| Complete List of Authors:     | Babor, Thomas F; University of Connecticut School of Medicine,<br>Robaina, Katherine; University of Connecticut School of Medicine,<br>Brown, Katherine<br>Noel, Jonathan<br>Cremonte, Mariana<br>Pantani, Daniela<br>Peltzer, Raquel<br>Pinsky, Ilana |
| Keywords:                     | alcohol industry, corporate social responsibility,, harmful drinking, IARD,<br>PUBLIC HEALTH                                                                                                                                                           |
|                               |                                                                                                                                                                                                                                                        |

SCHOLARONE™  
Manuscripts

Peer Review Only

1  
2  
3 DO NOT CITE OR QUOTE WITHOUT PERMISSION OF THE AUTHORS  
4

5 **Doing well by doing good: An empirical evaluation of the alcohol industry’s “Actions to**  
6  
7 **Reduce Harmful Drinking”**  
8

9  
10 Authors: Thomas F. Babor<sup>1</sup>, Katherine Robaina<sup>1</sup>, Katherine Brown<sup>2</sup>, Jonathan Noel<sup>3</sup>, Mariana  
11  
12 Cremonte<sup>4</sup>, Daniela Pantani<sup>5</sup>, Raquel I. Peltzer,<sup>4</sup> Ilana Pinsky<sup>6</sup>  
13

14  
15 <sup>1</sup>UConn Health - Dept. of Community Medicine and Health Care, Farmington, CT USA  
16

17 <sup>2</sup>Institute of Alcohol Studies (IAS), London UK  
18

19 <sup>3</sup>Johnson & Wales University, Department of Health Science, Providence, RI, USA  
20

21 <sup>4</sup>National University of Mar del Plata – CONICET, Complejo Universitario, Mar del Plata,  
22  
23 Argentina  
24

25  
26 <sup>5</sup>Federal University of São Paulo - Dept. of Psychiatry, São Paulo, Brazil  
27

28  
29 <sup>6</sup>The National Center on Addiction and Substance Abuse, New York, NY, USA  
30

31  
32  
33  
34  
35 **Corresponding author:**  
36

37 Katherine Robaina, MPH  
38

39 Dept. of Community Medicine & Health Care  
40

41 UCONN Health  
42

43 263 Farmington Avenue  
44

45 Farmington, CT 06030-6325  
46

47 Email: [robaina@uchc.edu](mailto:robaina@uchc.edu)  
48  
49  
50  
51  
52  
53  
54  
55  
56  
57

## Abstract

**Objectives:** The aims of this study were to: 1) describe the alcohol industry actions across six global geographic regions; 2) estimate the benefits accruing to the industry (“doing well”); and 3) estimate the public health impact of the actions (“doing good”). **Setting:** Actions from six geographic UN regions. **Participants:** A web-based compendium of 3551 Corporate Social Responsibility (CSR) initiatives, representing the efforts of the alcohol industry to reduce harmful alcohol use, was issued in 2012. The compendium consisted of short descriptions of each action, plus other information about the sponsorship, content and evaluation of the activities. Public health professionals (N=19) rated a sample (N = 1046) of the actions using a content rating procedure. **Outcome measures:** World Health Organization Global Strategy target area, estimated population reach, risk of harm, advertising potential, policy impact potential, and other aspects of the activity. **Results:** The industry actions were conducted disproportionately in regions with high-income countries (Europe and North America), with lower proportions in Latin America, Africa and Asia. Only 27% conformed to recommended WHO target areas for global action to reduce the harmful use of alcohol. The overwhelming majority (96.8%) of industry actions lacked scientific support ( $p < .01$ ) and 11.0% had the potential for doing harm. The benefits accruing to the industry (“doing well”) included brand marketing and the use of CSR to manage risk and achieve strategic goals. **Conclusion:** Alcohol industry CSR activities are unlikely to reduce harmful alcohol use but they do provide commercial strategic advantage while at the same time appearing to have a public health purpose. **Trial registration:** Non-applicable.

**Keywords:** alcohol industry, corporate social responsibility, harmful drinking, IARD

## Article Summary

### Strengths and limitations of this study

- Use of a global database of industry activities that is likely to be comprehensive and representative of the alcohol industry's CSR activities.
- Only a 30% sample was selected from the IARD database. Different conclusions may have resulted with a larger sample.
- Unable to estimate the costs of the industry actions to determine whether they represented significant charitable contributions or were merely activities that in some cases would have been conducted anyway (e.g., staff training at breweries).
- Although all raters were initially trained to an acceptable level of reliability, we cannot rule out differential bias in the raters recruited from different regions.

## Introduction

Corporate social responsibility (CSR) refers to business practices that help companies manage their economic, social, and environmental impacts, and their relationships in key areas of influence, such as the marketplace, the supply chain, the community, and the public policy arena [1-2]. The notion that commercial enterprises can “do well” (e.g., improve their brand image, increase their profitability) by “doing good” (i.e., contribute to socially beneficial groups and causes) has motivated this rapidly expanding global movement [3-4]. While the motives behind CSR vary, they appear to be indirectly related to the financial performance of corporations (e.g., [5-6]). CSR has been described as one of the few remaining strategies for unhealthy commodity industries (e.g., tobacco, alcohol, gambling) to present their products in a positive light and thereby improve their reputations [7-8]. Evidence indicates that the tobacco industry used CSR activities to improve their image, deflect criticism, enable access to policy makers, and mitigate legal risks, thereby increasing profits [7, 9-11]. Despite a substantial amount of published research that has questioned the motives of the alcohol industry’s CSR activities [12-15], little is known about the characteristics of these activities or their impact on public health [16].

The alcohol industry has invested significant resources to promote CSR initiatives around the world. In what is perhaps the largest initiative of its kind, on October 9, 2012, eleven major global producers of alcoholic beverages and two major trade associations issued a set of “Producers’ Commitments” to reduce harmful drinking (<http://www.producerscommitments.org/default.aspx>). To illustrate the industry’s efforts to fulfill these commitments, an industry-sponsored database (initially posted at [initiatives.global-actions.org](http://initiatives.global-actions.org), but subsequently removed) was created by the International Center for Alcohol Policies (ICAP) (now called the International Alliance for Responsible Drinking [IARD]). The

1  
2  
3 database was an inventory of over 3,500 “industry actions” conducted in support of the World  
4 Health Organization’s (WHO) Global Strategy to Reduce the Harmful Use of Alcohol (Global  
5 Strategy) [17]. The Global Strategy is a menu of ten evidence-based policy options that the  
6 WHO Member States can use to achieve reductions in harmful alcohol use. Contributors to the  
7 industry-supported database included multinational producers of beer, wine, and distilled spirits;  
8 alcohol distributors and wholesalers; members of related industries, such as hotels, restaurants,  
9 bars, and advertisers; and industry-affiliated social aspect and public relations organizations  
10 (SAPROs).  
11  
12  
13  
14  
15  
16  
17  
18  
19  
20

21  
22 Considering the significant contribution alcohol makes to global disease burden [17], this  
23 study evaluated whether the Global Producers’ actions reflect evidence-based approaches likely  
24 to reduce alcohol harm, or whether they are mainly conducted as a form of “stakeholder  
25 marketing” [18] designed to produce favorable public perceptions and less restrictive regulatory  
26 environments. To answer this question, we conducted a systematic evaluation of a sample of the  
27 industry actions using a content rating procedure designed to evaluate their public health  
28 implications and commercial benefits.  
29  
30  
31  
32  
33  
34  
35  
36

37  
38 The study had three aims: 1) to describe the global distribution of the industry actions  
39 according to UN geographic regions and high and low resource areas; 2) to estimate the benefits  
40 accruing to the industry in terms of marketing potential, impact on regulatory policy, and type of  
41 CSR strategy; and 3) to evaluate the public health impact of the industry actions in terms of their  
42 likely effectiveness and potential harm. We were particularly interested in the extent to which the  
43 industry’s actions conformed to options recommended by WHO and the evidence base that  
44 informed the Global Strategy. This is the first comprehensive analysis of the 3,500 industry  
45 actions posted on the ICAP/ IARD website. Analyses of the drinking and driving initiatives [19]  
46  
47  
48  
49  
50  
51  
52  
53  
54  
55  
56  
57  
58  
59  
60

1  
2  
3 and the marketing potential of the initiatives conducted in Latin America and the Caribbean [15]  
4  
5 have been published in prior reports.  
6  
7  
8  
9

## 10 **Methods**

11  
12 From 2014 until 2016, 19 trained raters from Brazil, Argentina, the USA, the European  
13 Union (EU) and Australia analyzed a sample of 1,046 industry actions. Data was exported from  
14 the website's print view from August 2013 to August 2015 prior to the database being shut down  
15 without explanation in April 2016. Actions were sorted by UN region and then alphabetically by  
16 action title. Units were selected so that the sampling strata maintained the proportions of the  
17 "target population," which in this case is the total number of industry actions (N=3,551). This  
18 means that each stratum (UN geographic region) has the same sampling fraction. Using data  
19 from two countries (US and UK) and one region (Latin America and the Caribbean) where all  
20 industry actions were rated, we determined that a proportionate sample size of 30% provided an  
21 accurate estimate of the actual distribution. The random sample generator function in SPSS was  
22 used to select the 30% sample from each UN region and those labeled by IARD as  
23 "international" or "global" (n = 1046).  
24  
25  
26  
27  
28  
29  
30  
31  
32  
33  
34  
35  
36  
37  
38  
39

40 **Patient and Public Involvement:** None

## 41 ***Descriptive Measures***

42  
43 An evidence benchmarking protocol was used to extract information on the sponsoring  
44 organization, partners, year started, country, and industry-reported evaluation (if applicable) for  
45 each industry action sampled from the database. Based on the short qualitative summaries of the  
46 actions (mean words per action = 132) provided on the website, we assigned numeric codes for  
47 the type of partners listed (e.g., government, Non-governmental organization (NGO), SAPRO,  
48  
49  
50  
51  
52  
53  
54  
55  
56  
57  
58  
59  
60



1  
2  
3 trade association, etc.) and for the type of evaluation reported by the industry (process  
4 evaluation, uncontrolled outcome evaluation, controlled outcome evaluation, or does not meet  
5 the minimum criteria). We used country names to define geographic regions following the  
6 United Nations Statistics Division (UNSD) classification of world regions (e.g., Africa, Asia)  
7 and sub-regions (e.g., Latin America and the Caribbean)  
8 (https://unstats.un.org/unsd/methodology/m49/) and the World Bank database  
9 (https://data.worldbank.org/country) to define country income-level.

10  
11  
12  
13  
14  
15  
16  
17  
18  
19 *Estimated Population Reach* refers to the number of people in the target group that could  
20 be served when an intervention is provided under real-world conditions. Coding options were  
21 none, small, moderate and large. This variable is relative and was coded after raters were trained  
22 using model scenarios. For example, if the action was implemented across the entire US, but  
23 only reached 10,000 people, it was coded as small.

### 30 ***Measures of Industry Benefits (“Doing well”)***

31  
32  
33 Each industry action was coded for *marketing potential*. If the action involved giving  
34 away promotional materials or marketed a specific product, it was coded as having “possible”  
35 marketing potential. Actions that did not meet this criterion and all activities undertaken by trade  
36 organizations or SAPROs were rated as having no marketing potential.

37  
38  
39  
40  
41  
42 The *policy impact potential* of each action (i.e., whether the action had the potential to  
43 impact national or local policy) was coded as “none” or “possible”. We coded only activities  
44 that had a clear political or policy impact as “possible”.

45  
46  
47  
48  
49 The type of *Corporate Social Responsibility* was coded based on previously published  
50 definitions [20]. Coding options were “none” – not having a social or environmental  
51 responsibility interpretation or not reflecting positively on the company; “altruistic” –

responsibilities that reflect giving back time or money to contribute solely to the wellbeing of a community or society at the possible expense of the business; “risk management” –legal or ethical obligations that are socially required; or “strategic” –aimed at achieving business goals while also promoting societal welfare. Coders were provided with examples and indicators for each type of CSR to minimize subjective bias.

### ***Societal (“Doing good”) Benefit Measures***

Raters assessed whether the initiative fit into any of the ten WHO Global Strategy target areas. If a clear match was not possible, based on descriptions in the WHO [17] Global Strategy, the initiative was coded as either “not classifiable” because of insufficient information, or “not compatible with any of the ten categories.”

*Activity type* was coded for each action in order to identify actions that had evidence of effectiveness [21]. Activities were coded according to a list of 67 interventions, campaigns, programs and policies that had been evaluated in prior research for effectiveness [21]. Actions that did not fit these activity types were coded as “other”, which had 12 sub-codes. These included administrative changes by a particular company, online media campaigns, industry-sponsored research, conference sponsorships, information for parents, promotional events and activities unrelated to reducing the harmful use of alcohol, such as scholarships for students being trained in the hospitality industry.

*Evidence of effectiveness* was coded from the public health perspective [21-22] by assigning scores to each coded activity to estimate its potential for reducing alcohol related-harm: 0 = lack of effectiveness; 1 = limited effectiveness; 2 = moderate effectiveness; 3 = high degree of effectiveness; 9 = no studies have been undertaken or there is insufficient evidence on which to make a judgment.

1  
2  
3 *Harm potential* was also assessed for each action. If an action was considered likely to  
4 pose a risk of harm based on current theory or evidence, harm potential was coded as “possible”.  
5  
6  
7  
8 Raters were instructed to code harm potential very conservatively, based on the available  
9  
10 evidence.

### 11 12 Training of raters.

13  
14  
15 Nineteen health professionals, addiction scientists and graduate students from Latin  
16 America (9), USA (3), the EU (5) and Australia (2) analyzed the industry actions within their  
17 respective regions. After the raters were trained at regional sites using a standardized protocol,  
18 they each rated the same 35 randomly selected actions from the database and discussed  
19 discrepancies until consensus was achieved. A second round of another 35 randomly selected  
20 initiatives was then conducted. After achieving an acceptable level of inter-rater reliability  
21 (kappa > .50), the raters continued rating the remaining actions independently.  
22  
23  
24  
25  
26  
27  
28  
29

### 30 31 Statistical Analyses.

32  
33 Data was analyzed using SPSS for Windows Version 24 (Armonk, NY: IBM Corp.).  
34  
35 Omnibus  $\chi^2$  tests were used to determine significant differences in variables that were  
36 dichotomous (e.g., marketing potential) or categorical (e.g. sponsoring organizations) across UN  
37 geographic regions that conformed approximately to the WHO regions used for administrative  
38 and statistical purposes.  
39  
40  
41  
42  
43

44  
45 Significance was set at  $p < 0.05$ . To understand the meaning of a significant omnibus  
46 test, several logistic regressions were used. In each model, a single UN region was compared  
47 against the rest of the world for a specific dependent variable. For instance, the prevalence of  
48 industry actions that had marketing potential in Africa was compared against the prevalence of  
49 industry actions with marketing potential in all other UN regions combined. Statistical  
50  
51  
52  
53  
54  
55  
56  
57  
58  
59  
60

1  
2  
3 significance was determined using 95% confidence intervals (CIs) of the resultant odds ratios.  
4  
5 This method allowed for increased interpretability of the results, while limiting the impact of  
6  
7 Type I error, which would have been a serious concern had pairwise comparisons been  
8  
9 implemented.  $\chi^2$  tests and Spearman correlations were also used to determine whether population  
10  
11 reach was correlated with marketing potential and effectiveness.  
12  
13

## 14 **Results**

15  
16 Table 1 presents descriptive information about the actions. More than half of the actions  
17  
18 were conducted in Europe (57.7%), and 76% were based in high-income countries. Less than 8%  
19  
20 of actions were conducted in lower-middle and low-income countries (LMIC). Despite the  
21  
22 claims of ICAP/ IARD that the actions were conducted “in support of” the Global Strategy [17],  
23  
24 most (65.7%) were initiated prior to the 2010 release of the Global Strategy, and some (10.4%)  
25  
26 prior to 2000, according to the dates provided in the listings.  
27  
28  
29

30  
31 <<INSERT TABLE 1 HERE>>  
32

### 33 ***Doing well: Benefits accruing to the industry***

34  
35 The first three sections of Table 2 show the regional percentages, odds ratios and  
36  
37 confidence intervals of three benefits accruing to the alcohol industry. Overall, 26.5% of the  
38  
39 actions were rated as having a marketing potential, 15.2% had the potential to have a policy  
40  
41 impact and 18.0% were classified as having a “strategic” CSR function. The proportion of  
42  
43 actions that were considered to have one or more of these benefits was 46.0%.  
44  
45  
46

47 <<INSERT TABLE 2 HERE>>  
48

49 Activities coded as having a marketing potential included giving away branded  
50  
51 merchandise and adding a responsible drinking message to the product’s commercial advertising  
52  
53 materials. There were significant differences in industry actions that contained marketing  
54  
55  
56  
57

1  
2  
3 potential across UN regions ( $\chi^2 = 47.44$ ;  $df = 6$ ;  $p < .01$ ). Actions conducted in Latin America  
4 and Africa were significantly more likely to have marketing potential compared to actions  
5 conducted in all other regions (Table 2). Actions conducted in Oceania had a significantly lower  
6 likelihood of marketing potential.  
7  
8  
9

10  
11  
12 We also evaluated the association between estimated population reach and marketing  
13 potential. Of the 277 actions with marketing potential, 44.4% had moderate to large population  
14 reach ( $\chi^2 = 29.31$ ;  $df = 1$ ;  $p < .01$ ). The Spearman correlation indicated a positive correlation,  
15 which was statistically significant ( $r_s(1046) = .158$ ,  $p = < .01$ ).  
16  
17  
18  
19  
20  
21

22 Fifteen percent (15.2%) of actions were found to have the potential to influence policies,  
23 for example, sponsoring of a traffic safety council or conducting workshops for policy makers  
24 (Table 2). Actions with policy potential differed significantly among regions ( $\chi^2 = 26.58$ ;  $df = 6$ ;  
25  $p < .01$ ). Actions in Africa, Oceania and those conducted on an international scale were  
26 considered more likely to have a policy impact.  
27  
28  
29  
30  
31  
32

33 Regarding the type of CSR, the majority of sampled actions (77.4%) were coded as “risk  
34 management” (e.g., “responsible drinking message added to labels”) while 18.0% were coded as  
35 strategic CSR (e.g., a conference promoting self-regulation of alcohol advertising) (Table 2). The  
36 number of actions categorized as having a strategic CSR approach was significantly different  
37 across regions ( $\chi^2 = 36.15$ ;  $df = 6$ ;  $p < .01$ ). A strategic CSR approach was more likely to be  
38 utilized on an international scale and in the African Region. Actions in North America were less  
39 likely to take a strategic CSR approach. Less than two percent (1.6%) of actions were coded as  
40 altruistic type CSR. Three percent of actions were coded as not fitting any CSR approach.  
41  
42  
43  
44  
45  
46  
47  
48  
49  
50  
51

52 ***Doing good: Public health impact of the industry actions***  
53  
54  
55  
56  
57

1  
2  
3 Table 3 shows the regional percentages, odds ratios and confidence intervals of industry  
4 actions that were consistent with the WHO Global Strategy targets. Overall, only 27.1% were  
5 considered classifiable into the WHO target areas, which was significantly different between UN  
6 regions ( $\chi^2 = 34.68$ ;  $df = 6$ ;  $p < .01$ ). Actions in Africa and North America were more likely to  
7 fall under one of the 10 Global Strategy target areas, although the majority of actions remained  
8 inconsistent with the Global Strategy.  
9

10  
11  
12  
13  
14  
15  
16  
17 <<INSERT TABLE 3 NEAR HERE>>  
18

19 Figure 1 compares the proportions classified into the 10 WHO Global Strategy areas by  
20 the public health raters with those classified by the industry and reported on the ICAP and IARD  
21 websites. The table shows substantial discrepancies between the proportions assigned to three  
22 key areas: leadership (22.3% IARD vs 3.0% public health raters), drinking and driving initiatives  
23 (28.7% vs 14.1%) and reducing negative consequences (27.4% vs. 3.6%). The main reason for  
24 these discrepancies was that the public health raters, using WHO definitions of the target areas,  
25 were not able to classify 72.9% of the actions into any of the 10 categories, either because they  
26 clearly did not fit the definitions (39.3%) or they were too vague (33.6%).  
27  
28  
29  
30  
31  
32  
33  
34  
35  
36

37  
38 <<INSERT FIGURE 1- NEAR HERE>>  
39

40 In addition to the ratings based on the broad WHO categories, separate ratings were  
41 conducted to classify the specific type of activity and to estimate its potential effectiveness.  
42 Table 4 shows how the actions were classified according to activity type and evidence for  
43 effectiveness. The majority of actions (75.9%) were coded “other” activity types which have not  
44 been evaluated in the literature. Each activity code was assigned an effectiveness score based on  
45 expert consensus ratings [21-22]. Since there were only 33 actions coded as limited, moderate or  
46 high effectiveness, these three categories were collapsed. There were considerably more  
47  
48  
49  
50  
51  
52  
53  
54  
55  
56  
57  
58  
59  
60

1  
2  
3 ineffective actions or actions of unknown effectiveness (96.8%) compared to effective actions  
4 overall ( $p < .01$ ). Nearly half of the actions (46.8%) were activities that have not been evaluated  
5 in the research. Over twenty percent (21.0%) were activities that were not relevant to public  
6 health (i.e. funding of SAPROs). Twenty-nine percent of the actions have been evaluated in the  
7 alcohol literature [21] and have been found not to be effective; 1.3% were found to have limited  
8 effectiveness. Only 1.8% of total activities sampled had evidence of moderate to high  
9 effectiveness (e.g., minimum legal alcohol purchase age).

10  
11  
12 Another part of the content ratings focused on the potential of the action (e.g., using the  
13 Grand Prix racing event to launch an awareness campaign) to cause harm. Eleven percent of  
14 actions were found to have the potential to cause harm from a public health perspective, which  
15 was significantly different across regions ( $\chi^2 = 32.98$ ;  $df = 6$ ;  $p < .01$ ). Actions that had a  
16 potential for harm were most likely to occur in LAC and Oceania and were least likely to occur  
17 in North America (Table 3).

18  
19  
20  
21  
22  
23  
24  
25  
26  
27  
28  
29  
30  
31  
32  
33 <<INSERT TABLE 4 HERE>>  
34

## 35 Discussion

36  
37  
38 The present analysis of CSR activities conducted by alcohol industry bodies ostensibly in  
39 support of the WHO's Global Strategy adopted a perspective that contrasted public health  
40 interests with the commercial interests of the alcohol industry. Our initial review of the data  
41 posted on the industry-reporting database suggested that the industry actions were compiled  
42 without consideration of the public scrutiny they might be subjected to. For example, most of the  
43 actions had start dates before the WHO Global Strategy was issued, raising questions about the  
44 screening process used and the aims of the database. In addition, the entire inventory of industry  
45 actions was removed without explanation as our study was underway, suggesting that IARD did  
46  
47  
48  
49  
50  
51  
52  
53  
54  
55  
56  
57  
58  
59  
60

1  
2  
3 not want to have its compendium of industry CSR initiatives subjected to careful scrutiny.  
4  
5 Within this context, the analyses we conducted provide insights into the motivations of the  
6  
7 alcohol industry in their approach to public health initiatives promoted by WHO to reduce the  
8  
9 harmful use of alcohol.  
10

11  
12 While the actions were found to be conducted disproportionately in HICs of Europe and  
13  
14 North America, actions in Africa and LAC were found to be significantly associated with an  
15  
16 increased likelihood for marketing potential. This is consistent with research suggesting that  
17  
18 competitive industries that depend on marketing to sell their products are more likely to include  
19  
20 product marketing in their CSR activities [3], and that the large producers are targeting  
21  
22 developing countries [23-24]. The positive association found between marketing potential and  
23  
24 population reach provides further indication that industry segments may be using the industry  
25  
26 actions for marketing purposes.  
27  
28  
29

30  
31 Regarding the benefits accruing to the alcohol industry (“doing well”), our analyses show  
32  
33 that the industry’s CSR activities tend overwhelmingly to be oriented toward risk management  
34  
35 and achieving strategic goals. Research suggests that industry-funded educational campaigns  
36  
37 lead to positive views of that industry [25]. As Bond, Daube, & Chikritzhs [26] note, alcohol  
38  
39 industry documents further demonstrate the public relations benefit of ‘responsibility’ messages  
40  
41 and education campaigns.  
42  
43

44  
45 Although alcohol industry bodies promoted the online inventory as a reflection of their  
46  
47 commitments to the WHO 2010 Global Strategy, 72.9% of the industry actions we evaluated  
48  
49 were scored as not conforming to the WHO recommended target categories. Some activities  
50  
51 (e.g., a brewery’s 60<sup>th</sup> anniversary celebration) seemed to contradict the intent of the Global  
52  
53 Strategy and were seemingly inconsistent with the stated purpose of the alcohol industry actions.  
54  
55  
56  
57



1  
2  
3 There were also major differences between the industry's classification of their own actions and  
4 those conducted by the expert raters. Whereas IARD classified most (75%) of the actions under  
5 the areas of leadership, drinking-driving countermeasures, and reducing negative consequences,  
6 the raters found that almost one-third were too vague to classify and another 38% did not fit any  
7 of the WHO categories. As an industry-funded SAPRO, ICAP/ IARD had a clear conflict of  
8 interest that could have biased their interpretation of the actions, as had been demonstrated in  
9 prior analyses of their international activities [27-28].

19 Estimates of the public health benefits showed that the overwhelming majority (96.8%)  
20 of industry actions lacked scientific support of their effectiveness in reducing harmful drinking  
21 and a small percentage (11.0%) had the potential for doing harm. These findings suggest that  
22 either the alcohol industry lacks the expertise to contribute constructively to the WHO Global  
23 Strategy, or they are using their CSR activities primarily for strategic commercial purposes, such  
24 as the dilution or avoidance of regulatory policies that would limit alcohol availability or raise its  
25 costs.  
26  
27  
28  
29  
30  
31  
32  
33  
34

35 One strength of this study is its use of a global database of industry activities that is likely  
36 to be comprehensive and representative of the alcohol industry's CSR activities. Our analysis  
37 indicates that those activities contribute minimally to the public health efforts of the World  
38 Health Organization. This research also had some methodological limitations. Because of  
39 resource limitations, we evaluated only a sample from the IARD database. Different conclusions  
40 may have resulted with a larger sample. In addition, we were not able to estimate the costs of the  
41 industry actions to determine whether they represented significant charitable contributions or  
42 were merely activities that in some cases would have been conducted anyway (e.g., staff training  
43  
44  
45  
46  
47  
48  
49  
50  
51  
52  
53  
54  
55  
56  
57  
58  
59  
60

1  
2  
3 at breweries). Although all raters were initially trained to an acceptable level of reliability, we  
4  
5 cannot rule out differential bias in the raters recruited from different regions.  
6

## 7 **Conclusion**

8  
9  
10 This analysis was conducted on activities compiled and promoted by the industry,  
11  
12 ostensibly in support of the WHO Global Strategy to Reduce the Harmful Use of Alcohol. It  
13  
14 represents a comprehensive inventory of the CSR activities conducted by a broad spectrum of the  
15  
16 alcohol industry, ranging from global producers to small, independent retailers and includes trade  
17  
18 associations and industry funded social aspects organizations. As such, it provides a window into  
19  
20 the CSR activities considered by the alcohol industry to have relevance to their response to the  
21  
22 WHO Global Strategy. The magnitude and global scope of these initiatives speaks to the ability  
23  
24 of the alcohol industry to mobilize its diverse commercial components in pursuit of a common  
25  
26 cause, much like the tobacco industry did before them. The Guidelines on Implementation of  
27  
28 Articles 5 and 13 of the WHO Framework Convention on Tobacco Control propose a ban on all  
29  
30 contributions from tobacco companies to any other entity for “socially responsible” causes as  
31  
32 “the aim, effect, or likely effect...is to promote...[the] product or use, either directly or  
33  
34 indirectly” [29]. Our analysis suggests that a similar ban would be appropriate for the alcohol  
35  
36 industry. This caveat was reiterated by then WHO Director General Margaret Chan in her  
37  
38 statement that alcohol companies should have “no role in the formulation of alcohol policies,  
39  
40 which must be protected from distortion by commercial or vested interests” [30]. More recently,  
41  
42 one transnational alcohol producer, AB InBev, pledged to spend one billion USD to reduce the  
43  
44 harmful use of alcohol worldwide by 10%. Far from confirming industry claims that they can  
45  
46 “do well” by “doing good,” the findings of the present study suggest that the public health  
47  
48  
49  
50  
51  
52  
53  
54  
55  
56  
57  
58  
59  
60

benefits of their CSR activities are likely to be minimal, whereas the public relations benefits can be substantial.

### **Abbreviations**

CSR - Corporate Social Responsibility

ICAP - International Center for Alcohol Policies

IARD - International Alliance for Responsible Drinking

LMIC - Lower-middle and low-income countries

SAPRO - Social Aspect and Public Relations Organization

WHO - World Health Organization

UNSD - United Nations Statistics Division

**Patient consent/involvement:** Not applicable, no human subjects or patients involved. The raters were co-investigators or research assistants or students, not the subject of the research.

### **Availability of data and materials:**

The industry action summaries are no longer available from the IARD website. Copies can be requested from the authors. The data coded from these summaries, which were used in the current study, are available from the authors upon reasonable request.

### **Competing interests**

The authors declare that they have no competing interests.

### **Funding**

1  
2  
3 The research was supported by the Institute of Alcohol Studies, and Dr. Babor's Endowed Chair  
4 in Community Medicine and Public Health. The analysis of the Latin America and the Caribbean  
5 industry actions was funded by the International Development Research Centre (funding number  
6 107203-001).  
7  
8  
9  
10  
11  
12  
13

### 14 **Contributors**

15  
16 TFB contributed to the design of the study, recruitment of personnel, planning of statistical  
17 analyses, and drafting of the manuscript. KR contributed to the design of the study, accessed the  
18 raw data, supervised the coding procedures, conducted the statistical analyses, trained coders,  
19 and helped to draft the manuscript. KB supervised the coding of EU data and helped to draft the  
20 manuscript. JN contributed to the design of the study, conducted some of the statistical analyses,  
21 and helped to draft the manuscript. MC and RIP recruited and supervised LAC raters, conducted  
22 ratings, assisted with the statistical analyses, and contributed to the drafting of the manuscript.  
23  
24 DP supervised LAC raters, conducted ratings, assisted with the statistical analyses, and  
25 contributed to the design of the study. IP contributed to the design of the study, obtained funding  
26 for the LAC data collection and analyses, conducted ratings and contributed to the drafting of the  
27 manuscript. All authors read, edited and approved the final manuscript.  
28  
29  
30  
31  
32  
33  
34  
35  
36  
37  
38  
39  
40  
41  
42  
43  
44

### 45 **Acknowledgements:**

46 We thank the following individuals for their assistance with this project: Jon Foster, Petrina  
47 MacNaughton, Neil Martin, Jon Noel, Nils Garnes, Habib Kadiri, Melissa Fuelner, Diego  
48 Sendoya, Gustavo Sónora Parodi, Aldana Lichtenberger, Karina Conde, Amy Ferguson, Michele  
49 Kosasih, Aweek Bhattacharya  
50  
51  
52  
53  
54  
55  
56  
57  
58  
59  
60

## References

1. United Nations. <https://www.unido.org/our-focus/advancing-economic-competitiveness/competitive-trade-capacities-and-corporate-responsibility/corporate-social-responsibility-market-integration/what-csr>. 2018. Accessed 12 March, 2018.
2. Garriga E, Melé D. Corporate Social Responsibility Theories: Mapping the Territory. *Journal of Business Ethics*. 2004; 53(1/2), 51-71.
3. Fisman R, Heal F, Nair VB. 2005. Corporate social responsibility: doing well by doing good? Working paper, Columbia University Business School, New York. Available at SSRN: <http://ssrn.com/abstract=813286>.
4. Falck O, Heblich S. Corporate social responsibility: Doing well by doing good. *Business Horizons*. 2007 May 1;50(3):247-54.
5. Vogel D. The market for virtue: The potential and limits of corporate social responsibility. Washington: The Brookings Institution, 2005.
6. Massin S. Is harm reduction profitable? An analytical framework for corporate social responsibility based on an epidemic model of addictive consumption. *Social Science & Medicine* 2012;74:1856e-1863
7. Barraclough S, Morrow M. A grim contradiction: the practice and consequences of corporate social responsibility by British American Tobacco in Malaysia. *Social science & medicine*. 2008 Apr 1;66(8):1784-96.

1  
2  
3 8. EUCAM. (2009). Corporate Social Responsibility: the new marketing tool.  
4

5 [http://eucam.info/wp-content/uploads/2014/05/trendrapport\\_csr.pdf](http://eucam.info/wp-content/uploads/2014/05/trendrapport_csr.pdf)  
6

7  
8 9. Fooks GJ, Gilmore AB, Smith KE, Collin J, Holden C, Lee K. Corporate social responsibility  
9  
10 and access to policy élites: an analysis of tobacco industry documents. PLoS medicine. 2011 Aug  
11  
12 23;8(8):e1001076.  
13

14  
15 10. Hirschhorn N. Corporate social responsibility and the tobacco industry: hope or hype?.  
16  
17 Tobacco control. 2004 Dec 1;13(4):447-53.  
18

19  
20 11. Palazzo G, Richter U. CSR business as usual? The case of the tobacco industry. Journal of  
21  
22 Business Ethics, 2005;61:387–401.  
23

24  
25 12. Mialon M, McCambridge J. Alcohol industry corporate social responsibility initiatives and  
26  
27 harmful drinking: a systematic review. European journal of public health. 2018 Apr 25.  
28

29  
30 13. Petticrew M, Maani Hessari N, Knai C, Weiderpass E. How alcohol industry organisations  
31  
32 mislead the public about alcohol and cancer. Drug and alcohol review. 2018 Mar;37(3):293-303.  
33

34  
35 14. Babor TF, Robaina K. Public health, academic medicine, and the alcohol industry’s corporate  
36  
37 social responsibility activities. American Journal of Public Health. 2013 Feb;103(2):206-14.  
38

39  
40 15. Pantani D, Peltzer R, Cremonte M, Robaina K, Babor T, Pinsky I. The marketing potential of  
41  
42 corporate social responsibility activities: the case of the alcohol industry in Latin America and  
43  
44 the Caribbean. Addiction. 2017 Jan 1;112(S1):74-80.  
45

46  
47 16. Kurucz, Elizabeth, Colbert, Barry, Wheeler, David (2008), “The business case for corporate  
48  
49 social responsibility”, in Crane, Andrew; McWilliams, Abigail; Matten, Dirk; Moon, Jeremy;  
50  
51 Siegel, Donald (eds.), *The Oxford Handbook of Corporate Social Responsibility*. New York:  
52  
53 Oxford University Press, 83-112.  
54  
55  
56  
57  
58  
59  
60

- 1  
2  
3 17. World Health Organization. Global strategy to reduce the harmful use of alcohol. Geneva:  
4 World Health Organization; 2010 (EB126/2010/REC/2).  
5  
6  
7 18. Hult GT, Mena JA, Ferrell OC, Ferrell L. Stakeholder marketing: a definition and conceptual  
8 framework. *AMS review*. 2011 Mar 1;1(1):44-65.  
9  
10 19. Esser MB, Bao J, Jernigan DH, Hyder AA. Evaluation of the evidence base for the alcohol  
11 industry's actions to reduce drink driving globally. *American Journal of Public Health*. 2016  
12 Apr;106(4):707-13.  
13  
14 20. Lantos, G. P. The boundaries of strategic corporate social responsibility, *Journal of*  
15 *Consumer Marketing*, 2001;Vol. 18 Issue: 7, pp.595-632,  
16  
17 <https://doi.org/10.1108/07363760110410281>  
18  
19 21. Babor, T., Caetano, R., Casswell, S., Edwards, G., Giesbrecht, N., Graham, K., Grube, J.,  
20 Hill, L., Holder, H., Homel, R., Livingstone, M., Österberg, E., Rehm, J., Room, R., Rossow, I.  
21 *Alcohol: No Ordinary Commodity - Research and Public Policy*. 2nd edition, Oxford: Oxford  
22 University Press, 2010.  
23  
24 22. Nelson TF, Xuan Z, Babor TF, Brewer RD, Chaloupka FJ, Gruenewald PJ, Holder H,  
25 Klitzner M, Mosher JF, Ramirez RL, Reynolds R. Efficacy and the strength of evidence of US  
26 alcohol control policies. *American journal of preventive medicine*. 2013 Jul 1;45(1):19-28.  
27  
28 23. Caetano R, Laranjeira R. A 'perfect storm' in developing countries: economic growth and the  
29 alcohol industry. *Addiction*. 2006 Feb 1;101(2):149-52.  
30  
31 24. Obot IS. Alcohol marketing in Africa: not an ordinary business. *African Journal of Drug and*  
32 *Alcohol Studies*. 2013;12(1).  
33  
34 25. Anderson P, Chisholm D, Fuhr DC. Effectiveness and cost-effectiveness of policies and  
35 programmes to reduce the harm caused by alcohol. *The lancet*. 2009 Jul 3;373(9682):2234-46.  
36  
37  
38  
39  
40  
41  
42  
43  
44  
45  
46  
47  
48  
49  
50  
51  
52  
53  
54  
55  
56  
57

- 1  
2  
3 26. Bond L, Daube M, Chikritzhs T. Access to confidential alcohol industry documents: from  
4 'Big Tobacco' to 'Big Booze'. *Australasian Medical Journal*. 2009;1(3):1-26.  
5  
6  
7  
8 27. Babor TF, Xuan Z. Article Commentary: Alcohol policy research and the grey literature.  
9  
10 *Nordic Studies on Alcohol and Drugs*. 2004 Feb;21(1\_suppl):125-37.  
11  
12 28. Jernigan DH. Global Alcohol Producers, Science, and Policy: The Case of the International  
13 Center for Alcohol Policies, *American Journal of Public Health* 102, no. 1 (January 1, 2012): pp.  
14 80-89. doi: 10.2105/AJPH.2011.300269  
15  
16  
17  
18 29. World Health Organization Conference of the Parties. 2008. Guidelines for implementation  
19 of Article 13 on the WHO Framework Convention on Tobacco Control (decision  
20 of Article 13 on the WHO Framework Convention on Tobacco Control (decision  
21 FCTC/COP3(12). [http://www.who.int/fctc/guidelines/article\\_13.pdf?ua=1](http://www.who.int/fctc/guidelines/article_13.pdf?ua=1). Accessed 12 March,  
22 2018.  
23  
24  
25  
26  
27  
28 30. Chan M. Re: Doctors and the alcohol industry: an unhealthy mix? *BMJ* online 11 April 2013  
29 Available at <http://www.bmj.com/content/346/bmj.f1889?>  
30  
31  
32  
33  
34  
35  
36  
37  
38  
39  
40  
41  
42  
43  
44  
45  
46  
47  
48  
49  
50  
51  
52  
53  
54  
55  
56  
57  
58  
59  
60



1  
2  
3  
4  
5  
6  
7  
8  
9  
10  
11  
12  
13  
14  
15  
16  
17  
18  
19  
20  
21  
22  
23  
24  
25  
26  
27  
28  
29  
30  
31  
32  
33  
34  
35  
36  
37  
38  
39  
40  
41  
42  
43  
44  
45  
46  
47  
48  
49  
50  
51  
52  
53  
54  
55  
56  
57  
58  
59  
60

**Figure Legend**

Figure 1. Percent of industry actions classified by IARD and by health professionals according to WHO Global Strategy target areas

For peer review only

**Table 1. Characteristics of Industry Actions to Reduce Harmful Drinking online compendium (n = 1046).**

|                                         | n (%)      |
|-----------------------------------------|------------|
| <b>Region<sup>a</sup></b>               |            |
| Africa                                  | 69 (6.6)   |
| Asia                                    | 63 (6.0)   |
| Europe                                  | 604 (57.7) |
| Latin America                           | 67 (6.4)   |
| North America                           | 163 (15.6) |
| Oceania                                 | 40 (3.8)   |
| International                           | 40 (3.8)   |
| <b>Country Income level<sup>b</sup></b> |            |
| High                                    | 797 (76.2) |
| Upper-middle                            | 127 (12.1) |
| Lower-middle                            | 59 (5.6)   |
| Low                                     | 22 (2.1)   |
| Multiple                                | 41 (3.9)   |
| <b>Year started<sup>c</sup></b>         |            |
| 1990-1999                               | 105 (10.4) |
| 2000-2009                               | 559 (55.3) |
| 2010-2014                               | 346 (34.2) |
| <b>Estimated Population reach</b>       |            |
| None                                    | 218 (20.8) |
| Small                                   | 499 (47.7) |
| Moderate                                | 218 (20.8) |
| Large                                   | 111 (10.6) |
| <b>Sponsor</b>                          |            |
| Producer                                | 537 (51.3) |
| SAPRO                                   | 306 (29.3) |
| Trade Association                       | 182 (17.4) |
| Other                                   | 21 (2.0)   |
| <b>Partner</b>                          |            |
| None reported                           | 509 (48.7) |
| Governmental                            | 64 (6.1)   |
| NGO/ University                         | 92 (8.8)   |
| SAPRO/ Trade Assoc.                     | 55 (5.3)   |
| Commercial                              | 65 (6.2)   |
| Multiple partner types                  | 170 (16.3) |
| 'Non specified collaborator'/ Other     | 91 (8.7)   |
| <b>Industry-reported Evaluation</b>     |            |
| None reported                           | 688 (65.7) |
| Does not meet min. criteria             | 92 (8.8)   |
| Process                                 | 217 (20.7) |
| Outcome                                 | 49 (4.7)   |

<sup>a</sup> Regions according to UN classifications.

<sup>b</sup> According to World Bank classifications

<sup>c</sup> N=1010 because of missing data

**Table 2. Percentages, Odds ratios and 95% CIs by region for marketing potential, potential policy impact and strategic CSR.**

| Region <sup>a</sup>     | Marketing Potential |                 |             | Policy Impact |                 |            | Strategic CSR Actions |                 |            |
|-------------------------|---------------------|-----------------|-------------|---------------|-----------------|------------|-----------------------|-----------------|------------|
|                         | %                   | OR <sup>b</sup> | 95% CI      | %             | OR <sup>b</sup> | 95% CI     | %                     | OR <sup>b</sup> | 95% CI     |
| Africa ( n = 69)        | 43.5                | 3.08            | 1.24, 7.64  | 29.0          | 2.46            | 1.41, 4.26 | 33.3                  | 2.45            | 1.45, 4.16 |
| Asia (n = 63)           | 15.9                | 0.50            | 0.25, 1.00  | 6.9           | 1.19            | 0.60, 2.34 | 20.6                  | 1.77            | 0.87, 3.61 |
| Europe (n = 604)        | 24.0                | 0.74            | 0.56, 0.97  | 13.9          | 0.79            | 0.56, 1.10 | 15.2                  | 0.64            | 0.47, 0.89 |
| LAC (n = 69)            | 53.7                | 4.65            | 1.87, 11.56 | 7.5           | 0.43            | 0.17, 1.09 | 22.4                  | 1.34            | 0.73, 2.44 |
| North America (n = 163) | 27.0                | 1.03            | 0.70, 1.50  | 10.4          | 0.6             | 0.35, 1.03 | 11.0                  | 0.52            | 0.31, 0.87 |
| Oceania (n = 40)        | 10.0                | 0.29            | 0.10, 0.84  | 27.5          | 2.19            | 1.07, 4.98 | 27.5                  | 1.77            | 0.87, 3.61 |
| International (n = 40)  | 33.3                | 0.68            | 0.31, 1.50  | 27.5          | 2.19            | 1.07, 4.98 | 40.0                  | 3.22            | 1.67, 6.19 |
| Totals (n=1046)         | 26.5                | .               | .           | 15.2          | .               | .          | 18.0                  | .               | .          |

<sup>a</sup>Regions based on UN classifications; <sup>b</sup>UN region compared to the rest of the world

**Table 3. Percentage, odds ratios and 95% CIs of actions rated as meeting WHO Global Strategy target areas and actions with potential for harm, by region (n = 1046)**

| Region <sup>a</sup>     | WHO Global Strategy target area met |                 |            | Potential for harm |                 |            |
|-------------------------|-------------------------------------|-----------------|------------|--------------------|-----------------|------------|
|                         | %                                   | OR <sup>b</sup> | 95% CI     | %                  | OR <sup>b</sup> | 95% CI     |
| Africa (n = 69)         | 39.1                                | 1.81            | 1.09, 2.99 | 7.2                | 0.61            | 0.24, 1.56 |
| Asia (n = 63)           | 23.8                                | 0.83            | 0.45, 1.51 | 15.9               | 1.57            | 0.77, 3.19 |
| Europe (n = 604)        | 24.8                                | 0.76            | 0.58, 1.01 | 9.6                | 0.71            | 0.48, 1.05 |
| LAC (n = 69)            | 32.8                                | 1.34            | 0.79, 2.28 | 25.4               | 3.05            | 1.69, 5.50 |
| North America (n = 163) | 38.7                                | 1.89            | 1.38, 2.69 | 6.1                | 0.48            | 0.24, 0.94 |
| Oceania (n = 40)        | 7.5                                 | 0.21            | 0.06, 0.68 | 27.5               | 3.29            | 1.59, 6.78 |
| International (n = 40)  | 10.0                                | 0.21            | 0.06, 0.68 | 10.0               | 0.89            | 0.31, 2.56 |

<sup>a</sup>Regions based on UN classifications; <sup>b</sup>UN region compared to the rest of the world

**Table 4. Activity type by level of effectiveness (n = 1046)**

| Activity Type (example)                                          | N    | Evidence of effectiveness |                  |
|------------------------------------------------------------------|------|---------------------------|------------------|
|                                                                  |      | None/Unknown              | Limited-Moderate |
| Availability ( <i>MLPA, different availability by strength</i> ) | 7    | 0.0                       | 0.7              |
| Environment ( <i>RBS training</i> )                              | 49   | 4.0                       | 0.7              |
| Drink-Driving ( <i>designated driver campaigns, safe rides</i> ) | 49   | 4.6                       | 0.1              |
| Brief Intervention and Treatment                                 | 5    | 0.0                       | 0.5              |
| Marketing ( <i>self regulation codes</i> )                       | 67   | 6.2                       | 0.2              |
| Education and Persuasion                                         | 75   | 6.1                       | 1.1              |
| 'Other' ( <i>activities with no evaluation research</i> )        | 794  | 75.9                      | 0.0              |
| Total                                                            | 1046 | 96.8%                     | 3.2%             |

1  
2  
3  
4  
5  
6  
7  
8  
9  
10  
11  
12  
13  
14  
15  
16  
17  
18  
19  
20  
21  
22  
23  
24  
25  
26  
27  
28  
29  
30  
31  
32  
33  
34  
35  
36  
37  
38  
39  
40  
41  
42  
43  
44  
45  
46  
47  
48  
49  
50  
51  
52  
53  
54  
55  
56  
57  
58  
59  
60

For peer review only

1  
2  
3  
4  
5  
6  
7  
8  
9  
10  
11  
12  
13  
14  
15  
16  
17  
18  
19  
20  
21  
22  
23  
24  
25  
26  
27  
28  
29  
30  
31  
32  
33  
34  
35  
36  
37  
38  
39  
40  
41  
42  
43  
44  
45  
46  
47  
48  
49  
50  
51  
52  
53  
54  
55  
56  
57  
58  
59  
60

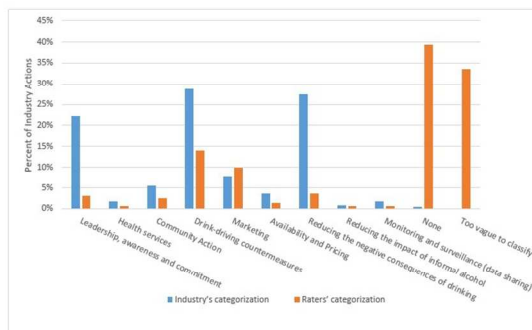

Figure 1. Percent of industry actions classified by IARD and by health professionals according to WHO Global Strategy target areas

338x190mm (96 x 96 DPI)

Review only

# BMJ Open

## Is the alcohol industry doing well by “doing good”? Findings from a content analysis of the alcohol industry’s Actions to Reduce Harmful Drinking

|                                 |                                                                                                                                                                                                                                                                                                                                                                                                                                                                                                                                                                                                                                                   |
|---------------------------------|---------------------------------------------------------------------------------------------------------------------------------------------------------------------------------------------------------------------------------------------------------------------------------------------------------------------------------------------------------------------------------------------------------------------------------------------------------------------------------------------------------------------------------------------------------------------------------------------------------------------------------------------------|
| Journal:                        | <i>BMJ Open</i>                                                                                                                                                                                                                                                                                                                                                                                                                                                                                                                                                                                                                                   |
| Manuscript ID                   | bmjopen-2018-024325.R1                                                                                                                                                                                                                                                                                                                                                                                                                                                                                                                                                                                                                            |
| Article Type:                   | Research                                                                                                                                                                                                                                                                                                                                                                                                                                                                                                                                                                                                                                          |
| Date Submitted by the Author:   | 07-Aug-2018                                                                                                                                                                                                                                                                                                                                                                                                                                                                                                                                                                                                                                       |
| Complete List of Authors:       | Babor, Thomas F; University of Connecticut School of Medicine, Dept. of Community Medicine and Health Care<br>Robaina, Katherine; University of Connecticut School of Medicine, Dept. of Community Medicine and Health Care<br>Brown, Katherine; Institute of Alcohol Studies (IAS)<br>Noel, Jonathan; Johnson & Wales University, Department of Health Science<br>Cremonte, Mariana; Universidad Nacional de Mar del Plata, CONICET<br>Pantani, Daniela; Universidade Federal de Sao Paulo, Dept. of Psychiatry<br>Peltzer, Raquel; Universidad Nacional de Mar del Plata<br>Pinsky, Ilana; The National Center on Addiction and Substance Abuse |
| <b>Primary Subject Heading</b>: | Public health                                                                                                                                                                                                                                                                                                                                                                                                                                                                                                                                                                                                                                     |
| Secondary Subject Heading:      | Global health, Public health                                                                                                                                                                                                                                                                                                                                                                                                                                                                                                                                                                                                                      |
| Keywords:                       | alcohol industry, harmful drinking, IARD, PUBLIC HEALTH, Corporate social responsibility                                                                                                                                                                                                                                                                                                                                                                                                                                                                                                                                                          |
|                                 |                                                                                                                                                                                                                                                                                                                                                                                                                                                                                                                                                                                                                                                   |

SCHOLARONE™  
Manuscripts

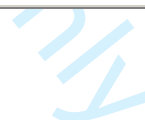

1  
2  
3 DO NOT CITE OR QUOTE WITHOUT PERMISSION OF THE AUTHORS  
4

5 **Is the alcohol industry doing well by “doing good”? Findings from a content analysis of the**  
6 **alcohol industry’s Actions to Reduce Harmful Drinking**  
7  
8

9  
10 Authors: Thomas F. Babor<sup>1</sup>, Katherine Robaina<sup>1</sup>, Katherine Brown<sup>2</sup>, Jonathan Noel<sup>3</sup>, Mariana  
11  
12 Cremonte<sup>4</sup>, Daniela Pantani<sup>5</sup>, Raquel I. Peltzer,<sup>4</sup> Ilana Pinsky<sup>6</sup>  
13

14  
15 <sup>1</sup>UConn Health - Dept. of Community Medicine and Health Care, Farmington, CT USA  
16

17 <sup>2</sup>Institute of Alcohol Studies (IAS), London UK  
18

19 <sup>3</sup>Johnson & Wales University, Department of Health Science, Providence, RI, USA  
20

21 <sup>4</sup>National University of Mar del Plata – CONICET, Complejo Universitario, Mar del Plata,  
22  
23 Argentina  
24

25  
26 <sup>5</sup>Federal University of São Paulo - Dept. of Psychiatry, São Paulo, Brazil  
27

28 <sup>6</sup>The National Center on Addiction and Substance Abuse, New York, NY, USA  
29  
30  
31  
32  
33  
34

35 **Corresponding author:**  
36

37 Katherine Robaina, MPH  
38

39 Dept. of Community Medicine & Health Care  
40

41 UCONN Health  
42

43 263 Farmington Avenue  
44

45 Farmington, CT 06030-6325  
46

47 Email: [robaina@uchc.edu](mailto:robaina@uchc.edu)  
48  
49  
50  
51  
52  
53  
54  
55  
56  
57



## Abstract

**Objectives:** The aims of this study were to: 1) describe alcohol industry Corporate Social Responsibility (CSR) actions conducted across six global geographic regions; 2) identify the benefits accruing to the industry (“doing well”); and 3) estimate the public health impact of the actions (“doing good”). **Setting:** Actions from six global geographic regions. **Participants:** A web-based compendium of 3551 industry actions, representing the efforts of the alcohol industry to reduce harmful alcohol use, was issued in 2012. The compendium consisted of short descriptions of each action, plus other information about the sponsorship, content and evaluation of the activities. Public health professionals (N = 19) rated a sample (N = 1046) of the actions using a content rating procedure. **Outcome measures:** World Health Organization Global Strategy target area, estimated population reach, risk of harm, advertising potential, policy impact potential, and other aspects of the activity. **Results:** The industry actions were conducted disproportionately in regions with high-income countries (Europe and North America), with lower proportions in Latin America, Africa and Asia. Only 27% conformed to recommended WHO target areas for global action to reduce the harmful use of alcohol. The overwhelming majority (96.8%) of industry actions lacked scientific support ( $p < .01$ ) and 11.0% had the potential for doing harm. The benefits accruing to the industry (“doing well”) included brand marketing and the use of CSR to manage risk and achieve strategic goals. **Conclusion:** Alcohol industry CSR activities are unlikely to reduce harmful alcohol use but they do provide commercial strategic advantage while at the same time appearing to have a public health purpose. **Trial registration:** Non-applicable.

**Keywords:** alcohol industry, corporate social responsibility, harmful drinking, IARD

## Article Summary

### Article focus

- This paper describes alcohol industry corporate social responsibility (CSR) actions across six global geographic regions, estimating the benefits accruing to the industry (“doing well”) and the public health impact of the actions (“doing good”).

### Strengths and limitations of this study

- Use of a global database of industry activities that is likely to be comprehensive and representative of the alcohol industry’s CSR activities.
- A 30% sample was selected from the International Alliance for Responsible Drinking (IARD) database. Different conclusions may have resulted with a larger sample.
- Unable to determine whether the industry actions represented significant charitable contributions or were merely activities that in some cases would have been conducted anyway (e.g., those required by law).
- Although all raters were initially trained to an acceptable level of reliability, we cannot rule out differential bias in the raters recruited from different regions.

## Introduction

Corporate social responsibility (CSR) refers to business practices that help companies manage their economic, social, and environmental impacts, and their relationships in key areas of influence, such as the marketplace, the supply chain, the community, and the public policy arena [1-2]. The notion that commercial enterprises can “do well” (e.g., improve their brand image, increase their profitability) by “doing good” (i.e., contribute to socially beneficial groups and causes) has motivated this rapidly expanding global movement [3-4]. While the motives behind CSR vary, they appear to be indirectly related to the financial performance of corporations (e.g., [5-6]). CSR has been described as one of the few remaining strategies for unhealthy commodity industries (e.g., tobacco, alcohol, gambling) to present their products in a positive light and thereby improve their reputations [7-8]. Evidence indicates that the tobacco industry used CSR activities to improve their image, deflect criticism, enable access to policy makers, and mitigate legal risks, thereby increasing profits [7, 9-11]. Despite a substantial amount of published research that has questioned the motives of the alcohol industry’s CSR activities [12-15], little is known about the characteristics of these activities or their impact on public health [16].

The alcohol industry has invested significant resources to promote CSR initiatives around the world. In what is perhaps the largest initiative of its kind, on October 9, 2012, eleven major global producers of alcoholic beverages and two major trade associations issued a set of “Producers’ Commitments” to reduce harmful drinking (<http://www.producerscommitments.org/default.aspx>). To illustrate the industry’s efforts to fulfill these commitments, an industry-sponsored database (initially posted at [initiatives.global-actions.org](http://initiatives.global-actions.org), but subsequently removed) was created by the International Center for Alcohol Policies (ICAP) (now called the International Alliance for Responsible Drinking [IARD]). The

1  
2  
3 database was an inventory of over 3,500 industry actions conducted in support of the World  
4  
5 Health Organization's (WHO) Global strategy to reduce the harmful use of alcohol (Global  
6  
7 strategy) [17]. The Global strategy is a menu of ten evidence-based policy options that the WHO  
8  
9 Member States can use to achieve reductions in harmful alcohol use. Contributors to the  
10  
11 industry-supported database included multinational producers of beer, wine, and distilled spirits;  
12  
13 alcohol distributors and wholesalers; members of related industries, such as hotels, restaurants,  
14  
15 bars, and advertisers; and industry-affiliated social aspect and public relations organizations  
16  
17 (SAPROs).  
18  
19  
20

21  
22 The present study had three aims: 1) to describe the global distribution of the industry  
23  
24 actions according to geographic regions and high and low resource areas; 2) to estimate the  
25  
26 benefits accruing to the industry in terms of marketing potential, impact on regulatory policy,  
27  
28 and type of CSR strategy; and 3) to evaluate the public health impact of the industry actions in  
29  
30 terms of their likely effectiveness and potential harm. We were particularly interested in the  
31  
32 extent to which the industry's actions conformed to options recommended by WHO and the  
33  
34 evidence base that informed the Global strategy. This is the first comprehensive analysis of the  
35  
36 3,500 industry actions posted on the ICAP/ IARD website. Analyses of the drinking and driving  
37  
38 initiatives [18] and the marketing potential of the initiatives conducted in Latin America and the  
39  
40 Caribbean [15] have been published in prior reports.  
41  
42  
43

44  
45 Considering the significant contribution alcohol makes to global disease burden [17], this  
46  
47 study evaluated whether the Global Producers' actions reflect evidence-based approaches likely  
48  
49 to reduce alcohol harm, or whether they are mainly conducted as a form of "stakeholder  
50  
51 marketing" [19] designed to produce favorable public perceptions and less restrictive regulatory  
52  
53 environments. To answer this question, we conducted a systematic evaluation of a sample of the  
54  
55  
56  
57

1  
2  
3 industry actions using a content rating procedure designed to evaluate their public health  
4  
5 implications and commercial benefits.  
6  
7  
8  
9

## 10 **Methods**

11  
12 From 2014 until 2016, 19 trained raters from Brazil, Argentina, the USA, the European  
13 Union (EU) and Australia analyzed a sample of 1,046 industry actions. Data was exported from  
14 the website's print view from August 2013 to August 2015 prior to the database being shut down  
15 without explanation in April 2016. Actions were sorted by region according to the geoscheme  
16 created by the United Nations Statistics Division (UNSD), and then alphabetically by action title.  
17 Units were selected so that the sampling strata maintained the proportions of the "target  
18 population," which in this case is the total number of industry actions (N = 3,551). This means  
19 that each stratum (UNSD geographic region) has the same sampling fraction. Using data from  
20 two countries (US and UK) and one region (Latin America and the Caribbean) where all industry  
21 actions were rated, we determined that a proportionate sample size of 30% provided an accurate  
22 estimate of the actual distribution. The random sample generator function in SPSS Windows  
23 Version 24 was used to select the 30% sample from each UN region and those labeled by IARD  
24 as "international" or "global" (n = 1046).  
25  
26  
27  
28  
29  
30  
31  
32  
33  
34  
35  
36  
37  
38  
39  
40  
41

42 **Patient and Public Involvement:** None  
43

## 44 ***Descriptive Measures***

45  
46 An evidence benchmarking protocol was used to extract information on the sponsoring  
47 organization, partners, year started, country, and industry-reported evaluation (if applicable) for  
48 each industry action sampled from the database. Based on the short qualitative summaries of the  
49 actions (mean words per action = 132) provided on the website, we assigned numeric codes for  
50  
51  
52  
53  
54  
55  
56  
57  
58  
59  
60

1  
2  
3 the type of partners listed (e.g., government, Non-governmental organization (NGO), SAPRO,  
4 trade association, etc.) and for the type of evaluation reported by the industry (process  
5 evaluation, uncontrolled outcome evaluation, controlled outcome evaluation, or does not meet  
6 the minimum criteria). We used country names to define geographic regions following the  
7  
8  
9  
10  
11  
12  
13  
14  
15  
16  
17  
18  
19  
20  
21  
22  
23  
24  
25  
26  
27  
28  
29  
30  
31  
32  
33  
34  
35  
36  
37  
38  
39  
40  
41  
42  
43  
44  
45  
46  
47  
48  
49  
50  
51  
52  
53  
54  
55  
56  
57  
58  
59  
60

the type of partners listed (e.g., government, Non-governmental organization (NGO), SAPRO, trade association, etc.) and for the type of evaluation reported by the industry (process evaluation, uncontrolled outcome evaluation, controlled outcome evaluation, or does not meet the minimum criteria). We used country names to define geographic regions following the UNSD classification of geographic regions (e.g., Africa, Asia) and sub-regions (e.g., Latin America and the Caribbean) (<https://unstats.un.org/unsd/methodology/m49/>) and the World Bank database (<https://data.worldbank.org/country>) to define country income-level.

*Estimated Population Reach* refers to the number of people in the target group that could be served when an intervention is provided under real-world conditions. Coding options were none, small, moderate and large. This variable is relative and was coded after raters were trained using model scenarios. For example, if the action was implemented across the entire US, but only reached 10,000 people, it was coded as small.

In addition to these descriptive characteristics of the industry actions, we also coded whether the activity was likely to produce benefits to the alcohol industry, and the ways in which society in general would benefit (or be harmed). These variables and their operational definitions are described in Table 1.

<<INSERT TABLE 1 NEAR HERE>>

### ***Measures of Industry Benefits (“Doing well”)***

Each industry action was coded for *marketing potential*. If the action involved giving away promotional materials or marketed a specific product, it was coded as having “possible” marketing potential. Actions that did not meet this criterion and all activities undertaken by trade organizations or SAPROs were rated as having no marketing potential.

1  
2  
3 The *policy impact potential* of each action (i.e., whether the action had the potential to  
4 impact national or local policy) was coded as “none” or “possible”. We coded only activities  
5 that had a clear political or policy impact as “possible”.  
6  
7  
8  
9

10 The type of *Corporate Social Responsibility* was coded based on previously published  
11 definitions [20]. Coding options were “none” – not having a social or environmental  
12 responsibility interpretation or not reflecting positively on the company; “altruistic” –  
13 responsibilities that reflect giving back time or money to contribute solely to the wellbeing of a  
14 community or society at the possible expense of the business; “risk management” –legal or  
15 ethical obligations that are socially required; or “strategic” –aimed at achieving business goals  
16 while also promoting societal welfare. Coders were provided with examples and indicators for  
17 each type of CSR to minimize subjective bias.  
18  
19  
20  
21  
22  
23  
24  
25  
26  
27

### 28 ***Societal Benefit Measures (“Doing good”)***

29  
30  
31 Raters assessed whether the initiative fit into any of the ten WHO Global strategy target  
32 areas. If a clear match was not possible, based on descriptions in the WHO [17] Global strategy,  
33 the initiative was coded as either “not classifiable” because of insufficient information, or “not  
34 compatible with any of the ten categories.”  
35  
36  
37  
38  
39

40 *Activity type* was coded for each action in order to identify actions that had evidence of  
41 effectiveness [21]. Activities were coded according to a list of 67 interventions, campaigns,  
42 programs and policies that had been evaluated in prior research for effectiveness [21]. Actions  
43 that did not fit these activity types were coded as “other”, which had 12 sub-codes. These  
44 included administrative changes by a particular company, online media campaigns, industry-  
45 sponsored research, conference sponsorships, information for parents, promotional events and  
46  
47  
48  
49  
50  
51  
52  
53  
54  
55  
56  
57  
58  
59  
60

1  
2  
3 activities unrelated to reducing the harmful use of alcohol, such as scholarships for students  
4  
5 being trained in the hospitality industry.  
6

7  
8 *Evidence of effectiveness* was coded from the public health perspective [21-22] by  
9  
10 assigning scores to each coded activity to estimate its potential for reducing alcohol related-  
11  
12 harm: 0 = lack of effectiveness; 1 = limited effectiveness; 2 = moderate effectiveness; 3 = high  
13  
14 degree of effectiveness; 9 = no studies have been undertaken or there is insufficient evidence on  
15  
16 which to make a judgment.  
17

18  
19 *Harm potential* was also assessed for each action. If an action was considered likely to  
20  
21 pose a risk of harm based on current theory or evidence, harm potential was coded as “possible”.  
22  
23 Raters were instructed to code harm potential very conservatively, based on the available  
24  
25 evidence.  
26

### 27 28 Training of raters. 29

30  
31 Nineteen public health professionals with expertise in alcohol control policy from Latin  
32  
33 America (9), USA (3), the EU (5) and Australia (2) analyzed the industry actions within their  
34  
35 respective regions. A rater training workshop was conducted by the protocol authors with each  
36  
37 regional team prior to the start of the global project to ensure consistency. After the raters were  
38  
39 trained at regional sites using a standardized protocol, they each rated the same 35 randomly  
40  
41 selected actions from the database, compared their ratings to the ratings of the protocol authors,  
42  
43 and discussed discrepancies with experts until consensus was achieved. A second round of  
44  
45 another 35 randomly selected initiatives was then conducted. After achieving an acceptable level  
46  
47 of inter-rater reliability ( $\kappa > .60$ ), the raters continued rating the remaining actions  
48  
49 independently.  
50  
51

### 52 53 Statistical Analyses. 54



1  
2  
3 Data was analyzed using SPSS for Windows Version 24 (Armonk, NY: IBM Corp.).  
4  
5 Omnibus  $\chi^2$  tests were used to determine significant differences in variables that were  
6  
7 dichotomous (e.g., marketing potential) or categorical (e.g. sponsoring organizations) across UN  
8  
9 geographic regions that conformed approximately to the WHO regions used for administrative  
10  
11 and statistical purposes.  
12  
13

14 Significance was set at  $p < 0.05$ . To understand the meaning of a significant omnibus  
15  
16 test, several logistic regressions were used. In each model, a single UN region was compared  
17  
18 against the rest of the world for a specific dependent variable. For instance, the prevalence of  
19  
20 industry actions that had marketing potential in Africa was compared against the prevalence of  
21  
22 industry actions with marketing potential in all other UN regions combined. Statistical  
23  
24 significance was determined using 95% confidence intervals (CIs) of the resultant odds ratios.  
25  
26 This method allowed for increased interpretability of the results, while limiting the impact of  
27  
28 Type I error, which would have been a serious concern had pairwise comparisons been  
29  
30 implemented.  $\chi^2$  tests and Spearman correlations were also used to determine whether population  
31  
32 reach was correlated with marketing potential and effectiveness.  
33  
34  
35  
36

### 37 **Results**

38  
39 Table 2 presents descriptive information about the actions. More than half of the actions  
40  
41 were conducted in Europe (57.7%), and 76% were based in high-income countries. Less than 8%  
42  
43 of actions were conducted in lower-middle and low-income countries (LMIC). Despite the  
44  
45 claims of ICAP/ IARD that the actions were conducted “in support of” the Global strategy [17],  
46  
47 most (65.7%) were initiated prior to the 2010 release of the Global strategy, and some (10.4%)  
48  
49 prior to 2000, according to the dates provided in the listings.  
50  
51  
52

53 <<INSERT TABLE 2 HERE>>  
54  
55  
56  
57

### ***Doing well: Benefits accruing to the industry***

The first three sections of Table 3 show the regional percentages, odds ratios and confidence intervals of three benefits accruing to the alcohol industry. Overall, 26.5% of the actions were rated as having a marketing potential, 15.2% had the potential to have a policy impact and 18.0% were classified as having a “strategic” CSR function. The proportion of actions that were considered to have one or more of these benefits was 46.0%.

<<INSERT TABLE 3 HERE>>

Activities coded as having a marketing potential included giving away branded merchandise and adding a responsible drinking message to the product’s commercial advertising materials. There were significant differences in industry actions that contained marketing potential across UN regions ( $\chi^2 = 47.44$ ;  $df = 6$ ;  $p < .01$ ). Actions conducted in Latin America and Africa were significantly more likely to have marketing potential compared to actions conducted in all other regions (Table 3). Actions conducted in Oceania had a significantly lower likelihood of marketing potential.

We also evaluated the association between estimated population reach and marketing potential. Of the 277 actions with marketing potential, 44.4% had moderate to large population reach ( $\chi^2 = 29.31$ ;  $df = 1$ ;  $p < .01$ ). The Spearman correlation indicated a positive correlation, which was statistically significant ( $r_s(1046) = .158$ ,  $p = < .01$ ).

Fifteen percent (15.2%) of actions were found to have the potential to influence policies, for example, sponsoring of a traffic safety council or conducting workshops for policy makers (Table 3). Actions with policy potential differed significantly among regions ( $\chi^2 = 26.58$ ;  $df = 6$ ;  $p < .01$ ). Actions in Africa, Oceania and those conducted on an international scale were considered more likely to have a policy impact.

1  
2  
3 Regarding the type of CSR, the majority of sampled actions (77.4%) were coded as “risk  
4 management” (e.g., “responsible drinking message added to labels”) while 18.0% were coded as  
5 strategic CSR (e.g., a conference promoting self-regulation of alcohol advertising) (Table 3). The  
6 number of actions categorized as having a strategic CSR approach was significantly different  
7 across regions ( $\chi^2 = 36.15$ ;  $df = 6$ ;  $p < .01$ ). A strategic CSR approach was more likely to be  
8 utilized on an international scale and in the African Region. Actions in North America were less  
9 likely to take a strategic CSR approach. Less than two percent (1.6%) of actions were coded as  
10 altruistic type CSR. Three percent of actions were coded as not fitting any CSR approach.

### 21 ***Doing good: Public health impact of the industry actions***

22  
23  
24 Table 4 shows the regional percentages, odds ratios and confidence intervals of industry  
25 actions that were consistent with the WHO Global strategy targets. Overall, only 27.1% were  
26 considered classifiable into the WHO target areas, which was significantly different between UN  
27 regions ( $\chi^2 = 34.68$ ;  $df = 6$ ;  $p < .01$ ). Actions in Africa and North America were more likely to  
28 fall under one of the 10 Global strategy target areas, although the majority of actions remained  
29 inconsistent with the Global strategy.

30  
31  
32  
33  
34  
35  
36  
37  
38 <<INSERT TABLE 4 NEAR HERE>>

39  
40 Figure 1 compares the proportions classified into the 10 WHO Global strategy areas by  
41 the public health raters with those classified by the industry and reported on the ICAP and IARD  
42 websites. The table shows substantial discrepancies between the proportions assigned to three  
43 key areas: leadership (22.3% IARD vs 3.0% public health raters), drinking and driving initiatives  
44 (28.7% vs 14.1%) and reducing negative consequences (27.4% vs. 3.6%). The main reason for  
45 these discrepancies was that the public health raters, using WHO definitions of the target areas,  
46  
47  
48  
49  
50  
51  
52  
53  
54  
55  
56  
57  
58  
59  
60

1  
2  
3 were not able to classify 72.9% of the actions into any of the 10 categories, either because they  
4 clearly did not fit the definitions (39.3%) or they were too vague (33.6%).  
5  
6

7 <<INSERT FIGURE 1- NEAR HERE>>  
8  
9

10 In addition to the ratings based on the broad WHO categories, separate ratings were  
11 conducted to classify the specific type of activity and to estimate its potential effectiveness.  
12 Table 5 shows how the actions were classified according to activity type and evidence for  
13 effectiveness. The majority of actions (75.9%) were coded “other” activity types which have not  
14 been evaluated in the literature. Activities coded here include posters, leaflets and websites,  
15 industry-sponsored conferences, funding of SAPRPOs, and updates to producer employee  
16 handbooks. Each activity code was assigned an effectiveness score based on expert consensus  
17 ratings [21-22]. Since there were only 33 actions coded as limited, moderate or high  
18 effectiveness, these three categories were collapsed. There were considerably more ineffective  
19 actions or actions of unknown effectiveness (96.8%) compared to effective actions overall ( $p$   
20  $<.01$ ). Nearly half of the actions (46.8%) were activities that have not been evaluated in the  
21 research. Over twenty percent (21.0%) were activities that were not relevant to public health (i.e.  
22 funding of SAPROs). Twenty-nine percent of the actions have been evaluated in the alcohol  
23 literature [21] and have been found not to be effective; 1.3% were found to have limited  
24 effectiveness. Only 1.8% of total activities sampled had evidence of moderate to high  
25 effectiveness (e.g., minimum legal alcohol purchase age).  
26  
27  
28  
29  
30  
31  
32  
33  
34  
35  
36  
37  
38  
39  
40  
41  
42  
43  
44  
45

46 Another part of the content ratings focused on the potential of the action to cause harm  
47 (e.g., using the Grand Prix racing event to launch an awareness campaign). Eleven percent of  
48 actions were found to have the potential to cause harm from a public health perspective, which  
49 was significantly different across regions ( $\chi^2 = 32.98$ ;  $df = 6$ ;  $p <.01$ ). Actions that had a  
50  
51  
52  
53  
54  
55  
56  
57  
58  
59  
60

1  
2  
3 potential for harm were most likely to occur in LAC and Oceania and were least likely to occur  
4  
5 in North America (Table 4).  
6

7  
8 <<INSERT TABLE 5 HERE>>  
9

## 10 **Discussion**

11  
12 The present analysis of CSR activities conducted by alcohol industry bodies ostensibly in  
13 support of the WHO's Global strategy adopted a perspective that contrasted public health  
14 interests with the commercial interests of the alcohol industry. While the actions were found to  
15 be conducted disproportionately in HICs of Europe and North America, actions in Africa and  
16 LAC were found to be significantly associated with an increased likelihood for marketing  
17 potential. This is consistent with research suggesting that competitive industries that depend on  
18 marketing to sell their products are more likely to include product marketing in their CSR  
19 activities [3], and that the large producers are targeting developing countries [23-24]. The  
20 positive association found between marketing potential and population reach provides further  
21 indication that industry segments may be using the industry actions for marketing purposes.  
22  
23  
24  
25  
26  
27  
28  
29  
30  
31  
32  
33  
34

35 Regarding the benefits accruing to the alcohol industry ("doing well"), our analyses show  
36 that the industry's CSR activities tend overwhelmingly to be oriented toward risk management  
37 and achieving strategic goals. Research suggests that industry-funded educational campaigns  
38 lead to positive views of that industry [25]. As Bond, Daube, & Chikritzhs [26] note, alcohol  
39 industry documents further demonstrate the public relations benefit of 'responsibility' messages  
40 and education campaigns.  
41  
42  
43  
44  
45  
46  
47  
48

49 Although alcohol industry bodies promoted the online inventory as a reflection of their  
50 commitments to the WHO 2010 Global strategy, 72.9% of the industry actions we evaluated  
51 were scored as not conforming to the WHO recommended target categories. Some activities  
52  
53  
54  
55  
56  
57  
58  
59  
60

1  
2  
3 (e.g., a brewery's 60<sup>th</sup> anniversary celebration) seemed to contradict the intent of the Global  
4  
5 strategy and were seemingly inconsistent with the stated purpose of the alcohol industry actions.  
6  
7 There were also major differences between the industry's classification of their own actions and  
8  
9 those conducted by the expert raters. Whereas IARD classified most (75%) of the actions under  
10  
11 the areas of leadership, drinking-driving countermeasures, and reducing negative consequences,  
12  
13 the raters found that almost one-third were too vague to classify and another 38% did not fit any  
14  
15 of the WHO categories. As an industry-funded SAPRO, ICAP/ IARD had a clear conflict of  
16  
17 interest that could have biased their interpretation of the actions, as had been demonstrated in  
18  
19 prior analyses of their international activities [27-28]. Of note, most of the actions had start dates  
20  
21 before the WHO Global strategy was issued, raising questions about the screening process used  
22  
23 and the aims of the database.  
24  
25  
26  
27

28  
29 Estimates of the public health benefits and harms showed that the overwhelming majority  
30  
31 (96.8%) of industry actions lacked scientific support of their effectiveness in reducing harmful  
32  
33 drinking and a small percentage (11.0%) had the potential for doing harm. The Guidelines on  
34  
35 Implementation of Articles 5 and 13 of the WHO Framework Convention on Tobacco Control  
36  
37 propose a ban on all contributions from tobacco companies to any other entity for "socially  
38  
39 responsible" causes as "the aim, effect, or likely effect...is to promote...[the] product or use,  
40  
41 either directly or indirectly" [29]. Our analysis suggests that a similar ban would be appropriate  
42  
43 for the alcohol industry. This caveat was reiterated by then WHO Director General Margaret  
44  
45 Chan in her statement that alcohol companies should have "no role in the formulation of alcohol  
46  
47 policies, which must be protected from distortion by commercial or vested interests" [30].  
48  
49  
50  
51  
52  
53  
54  
55  
56  
57  
58  
59  
60

1  
2  
3 One strength of this study is its use of a global database of industry activities that is likely  
4 to be comprehensive and representative of the alcohol industry's CSR activities. Our analysis  
5 indicates that those activities contribute minimally to the public health efforts of the World  
6 Health Organization. This research also had some methodological limitations. Because of  
7 resource limitations, we evaluated only a sample from the IARD database. Different conclusions  
8 may have resulted with a larger sample. In addition, we were not able to estimate the costs to the  
9 industry of the actions conducted to determine whether they represented significant charitable  
10 contributions or were merely activities that in some cases would have been conducted anyway  
11 (e.g., staff training at breweries or actions which are already required by law). Although raters  
12 were all trained to an acceptable level of reliability, we cannot rule out differential bias in the  
13 raters recruited from different regions.

## 28 **Conclusion**

30 This analysis provides a window into the CSR activities considered by the alcohol  
31 industry to have relevance to their response to the WHO Global strategy. The magnitude and  
32 global scope of these initiatives speaks to the ability of the alcohol industry to mobilize its  
33 diverse commercial components in pursuit of a common cause, much like the tobacco industry  
34 did before them. Far from confirming industry claims that they can "do well" by "doing good,"  
35 the findings of the present study suggest that the public health benefits of their CSR activities are  
36 likely to be minimal, whereas the public relations benefits can be substantial.

## 48 **Abbreviations**

50 CI - Confidence Interval

52 CSR - Corporate Social Responsibility

54 ICAP - International Center for Alcohol Policies

1  
2  
3 IARD - International Alliance for Responsible Drinking

4  
5 LMIC - Lower-middle and low-income countries

6  
7  
8 SAPRO - Social Aspect and Public Relations Organization

9  
10 WHO - World Health Organization

11  
12 UN - United Nations

13  
14  
15 UNSD - United Nations Statistics Division

16  
17  
18  
19 **Patient consent/involvement:** Not applicable, no human subjects or patients involved. The  
20  
21 raters were co-investigators or research assistants or students, not the subject of the research.  
22  
23

24  
25  
26 **Data sharing statement:**

27  
28 The industry action summaries are no longer available from the IARD website. Copies can be  
29  
30 requested from the authors. The data coded from these summaries, which were used in the  
31  
32 current study, are available from the authors upon reasonable request.  
33  
34

35  
36  
37  
38 **Competing interests**

39  
40 The authors declare that they have no competing interests.  
41  
42  
43

44  
45 **Funding**

46  
47 The research was supported by the Institute of Alcohol Studies, and Dr. Babor's Endowed Chair  
48  
49 in Community Medicine and Public Health. The analysis of the Latin America and the Caribbean  
50  
51 industry actions was funded by the International Development Research Centre (funding number  
52  
53 107203-001).  
54  
55  
56  
57



## Contributors

TFB contributed to the design of the study, recruitment of personnel, planning of statistical analyses, and drafting of the manuscript. KR contributed to the design of the study, accessed the raw data, supervised the coding procedures, conducted the statistical analyses, trained coders, and helped to draft the manuscript. KB supervised the coding of EU data and helped to draft the manuscript. JN contributed to the design of the study, conducted some of the statistical analyses, and helped to draft the manuscript. MC and RIP recruited and supervised LAC raters, conducted ratings, assisted with the statistical analyses, and contributed to the drafting of the manuscript. DP supervised LAC raters, conducted ratings, assisted with the statistical analyses, and contributed to the design of the study. IP contributed to the design of the study, obtained funding for the LAC data collection and analyses, conducted ratings and contributed to the drafting of the manuscript. All authors read, edited and approved the final manuscript.

## Acknowledgements:

We thank the following individuals for their assistance with this project: Jon Foster, Petrina MacNaughton, Neil Martin, Jon Noel, Nils Garnes, Habib Kadiri, Melissa Fuelner, Diego Sendoya, Gustavo S  nora Parodi, Aldana Lichtenberger, Karina Conde, Amy Ferguson, Michele Kosasih, Aveek Bhattacharya

## References

- 1  
2  
3  
4  
5  
6  
7  
8  
9  
10  
11  
12  
13  
14  
15  
16  
17  
18  
19  
20  
21  
22  
23  
24  
25  
26  
27  
28  
29  
30  
31  
32  
33  
34  
35  
36  
37  
38  
39  
40  
41  
42  
43  
44  
45  
46  
47  
48  
49  
50  
51  
52  
53  
54  
55  
56  
57  
58  
59  
60
1. United Nations. <https://www.unido.org/our-focus/advancing-economic-competitiveness/competitive-trade-capacities-and-corporate-responsibility/corporate-social-responsibility-market-integration/what-csr>. 2018. Accessed 12 March, 2018.
2. Garriga E, Melé D. Corporate Social Responsibility Theories: Mapping the Territory. *Journal of Business Ethics*. 2004; 53(1/2), 51-71.
3. Fisman R, Heal F, Nair VB. 2005. Corporate social responsibility: doing well by doing good? Working paper, Columbia University Business School, New York. Available at SSRN: <http://ssrn.com/abstract=813286>.
4. Falck O, Heblich S. Corporate social responsibility: Doing well by doing good. *Business Horizons*. 2007 May 1;50(3):247-54.
5. Vogel D. The market for virtue: The potential and limits of corporate social responsibility. Washington: The Brookings Institution, 2005.
6. Massin S. Is harm reduction profitable? An analytical framework for corporate social responsibility based on an epidemic model of addictive consumption. *Social Science & Medicine* 2012;74:1856e-1863
7. Barraclough S, Morrow M. A grim contradiction: the practice and consequences of corporate social responsibility by British American Tobacco in Malaysia. *Social science & medicine*. 2008 Apr 1;66(8):1784-96.
8. EUCAM. (2009). Corporate Social Responsibility: the new marketing tool. [http://eucam.info/wp-content/uploads/2014/05/trendrapport\\_csr.pdf](http://eucam.info/wp-content/uploads/2014/05/trendrapport_csr.pdf)

- 1  
2  
3 9. Fooks GJ, Gilmore AB, Smith KE, Collin J, Holden C, Lee K. Corporate social responsibility  
4 and access to policy élites: an analysis of tobacco industry documents. PLoS medicine. 2011 Aug  
5 23;8(8):e1001076.  
6  
7
- 8  
9  
10 10. Hirschhorn N. Corporate social responsibility and the tobacco industry: hope or hype?.  
11 Tobacco control. 2004 Dec 1;13(4):447-53.  
12  
13
- 14 11. Palazzo G, Richter U. CSR business as usual? The case of the tobacco industry. Journal of  
15 Business Ethics, 2005;61:387–401.  
16  
17
- 18 12. Mialon M, McCambridge J. Alcohol industry corporate social responsibility initiatives and  
19 harmful drinking: a systematic review. European journal of public health. 2018 Apr 25.  
20  
21
- 22 13. Petticrew M, Maani Hessari N, Knai C, Weiderpass E. How alcohol industry organisations  
23 mislead the public about alcohol and cancer. Drug and alcohol review. 2018 Mar;37(3):293-303.  
24  
25
- 26 14. Babor TF, Robaina K. Public health, academic medicine, and the alcohol industry’s corporate  
27 social responsibility activities. American Journal of Public Health. 2013 Feb;103(2):206-14.  
28  
29
- 30 15. Pantani D, Peltzer R, Cremonte M, Robaina K, Babor T, Pinsky I. The marketing potential of  
31 corporate social responsibility activities: the case of the alcohol industry in Latin America and  
32 the Caribbean. Addiction. 2017 Jan 1;112(S1):74-80.  
33  
34
- 35 16. Kurucz, Elizabeth, Colbert, Barry, Wheeler, David (2008), “The business case for corporate  
36 social responsibility”, in Crane, Andrew; McWilliams, Abigail; Matten, Dirk; Moon, Jeremy;  
37 Siegel, Donald (eds.), *The Oxford Handbook of Corporate Social Responsibility*. New York:  
38 Oxford University Press, 83-112.  
39  
40
- 41 17. World Health Organization. Global strategy to reduce the harmful use of alcohol. Geneva:  
42 World Health Organization; 2010 (EB126/2010/REC/2).  
43  
44  
45  
46  
47  
48  
49  
50  
51  
52  
53  
54  
55  
56  
57  
58  
59  
60

- 1  
2  
3 18. Esser MB, Bao J, Jernigan DH, Hyder AA. Evaluation of the evidence base for the alcohol  
4 industry's actions to reduce drink driving globally. *American Journal of Public Health*. 2016  
5  
6 Apr;106(4):707-13.  
7  
8  
9  
10 19. Hult GT, Mena JA, Ferrell OC, Ferrell L. Stakeholder marketing: a definition and conceptual  
11 framework. *AMS review*. 2011 Mar 1;1(1):44-65.  
12  
13  
14 20. Lantos, G. P. The boundaries of strategic corporate social responsibility, *Journal of*  
15  
16  
17  
18  
19  
20  
21  
22  
23  
24  
25  
26  
27  
28  
29  
30  
31  
32  
33  
34  
35  
36  
37  
38  
39  
40  
41  
42  
43  
44  
45  
46  
47  
48  
49  
50  
51  
52  
53  
54  
55  
56  
57  
58  
59  
60
21. Babor, T., Caetano, R., Casswell, S., Edwards, G., Giesbrecht, N., Graham, K., Grube, J., Hill, L., Holder, H., Homel, R., Livingstone, M., Österberg, E., Rehm, J., Room, R., Rossow, I. *Alcohol: No Ordinary Commodity - Research and Public Policy*. 2nd edition, Oxford: Oxford University Press, 2010.
22. Nelson TF, Xuan Z, Babor TF, Brewer RD, Chaloupka FJ, Gruenewald PJ, Holder H, Klitzner M, Mosher JF, Ramirez RL, Reynolds R. Efficacy and the strength of evidence of US alcohol control policies. *American journal of preventive medicine*. 2013 Jul 1;45(1):19-28.
23. Caetano R, Laranjeira R. A 'perfect storm' in developing countries: economic growth and the alcohol industry. *Addiction*. 2006 Feb 1;101(2):149-52.
24. Obot IS. Alcohol marketing in Africa: not an ordinary business. *African Journal of Drug and Alcohol Studies*. 2013;12(1).
25. Anderson P, Chisholm D, Fuhr DC. Effectiveness and cost-effectiveness of policies and programmes to reduce the harm caused by alcohol. *The lancet*. 2009 Jul 3;373(9682):2234-46.
26. Bond L, Daube M, Chikritzhs T. Access to confidential alcohol industry documents: from 'Big Tobacco' to 'Big Booze'. *Australasian Medical Journal*. 2009;1(3):1-26.

- 1  
2  
3 27. Babor TF, Xuan Z. Article Commentary: Alcohol policy research and the grey literature.  
4  
5 Nordic Studies on Alcohol and Drugs. 2004 Feb;21(1\_suppl):125-37.  
6  
7  
8 28. Jernigan DH. Global Alcohol Producers, Science, and Policy: The Case of the International  
9  
10 Center for Alcohol Policies, American Journal of Public Health 102, no. 1 (January 1, 2012): pp.  
11  
12 80-89. doi: 10.2105/AJPH.2011.300269  
13  
14  
15 29. World Health Organization Conference of the Parties. 2008. Guidelines for implementation  
16  
17 of Article 13 on the WHO Framework Convention on Tobacco Control (decision  
18  
19 FCTC/COP3(12). [http://www.who.int/fctc/guidelines/article\\_13.pdf?ua=1](http://www.who.int/fctc/guidelines/article_13.pdf?ua=1). Accessed 12 March,  
20  
21 2018.  
22  
23  
24 30. Chan M. Re: Doctors and the alcohol industry: an unhealthy mix? BMJ online 11 April 2013  
25  
26 Available at <http://www.bmj.com/content/346/bmj.f1889?>  
27  
28  
29  
30  
31  
32  
33  
34  
35  
36  
37  
38  
39  
40  
41  
42  
43  
44  
45  
46  
47  
48  
49  
50  
51  
52  
53  
54  
55  
56  
57  
58  
59  
60

1  
2  
3  
4  
5  
6  
7  
8  
9  
10  
11  
12  
13  
14  
15  
16  
17  
18  
19  
20  
21  
22  
23  
24  
25  
26  
27  
28  
29  
30  
31  
32  
33  
34  
35  
36  
37  
38  
39  
40  
41  
42  
43  
44  
45  
46  
47  
48  
49  
50  
51  
52  
53  
54  
55  
56  
57  
58  
59  
60

**Figure Legend**

Figure 1. Percent of industry actions classified by IARD and by health professionals according to WHO Global Strategy target areas

For peer review only

Table 1. Measurement domains, variables measured and coding options used in content analysis of alcohol industry CSR activities.

| Measurement Domain                              | Variable Name                   | What is measured                                                                                                      | Coding options                                                                                                                               |
|-------------------------------------------------|---------------------------------|-----------------------------------------------------------------------------------------------------------------------|----------------------------------------------------------------------------------------------------------------------------------------------|
| <b>Industry Benefit Measures (“Doing well”)</b> | Marketing/advertising potential | Whether the action has the potential to promote a specific brand or product.                                          | None; possible                                                                                                                               |
|                                                 | Policy impact potential         | Whether the action has the potential to impact national or local policy                                               | None; possible                                                                                                                               |
|                                                 | CSR type                        | Likely operational impact rather than presumed motivation of industry actor                                           | None, strategic, risk management, altruistic                                                                                                 |
| <b>Societal Benefit Measures (“Doing good”)</b> | WHO Global strategy target area | Whether the action covers one of the 10 target areas recommended by the WHO Global strategy                           | 0 = Not consistent with any Global Strategy area<br>1-10 = consistent with one of the 10 Global strategy areas<br>11 = too vague to classify |
|                                                 | Activity type                   | Whether the action fit a list of 67 interventions, campaigns, programs and policies that have been evaluated in prior | Chose one of 78 activity types, of which 66 have been evaluated and 12 ‘other’ which had not been                                            |

|  |                           |                                                                                             |                                                                                                                                                                                                                                                                                                                                           |
|--|---------------------------|---------------------------------------------------------------------------------------------|-------------------------------------------------------------------------------------------------------------------------------------------------------------------------------------------------------------------------------------------------------------------------------------------------------------------------------------------|
|  |                           | research for effectiveness                                                                  | subjected to research                                                                                                                                                                                                                                                                                                                     |
|  | Evidence of effectiveness | Estimate its potential for reducing alcohol related harm based on the scientific literature | The 78 activity types were coded as follows:<br>0 = Evidence indicates a lack of effectiveness<br>1= Evidence for limited effectiveness<br>2= Evidence for moderate effectiveness<br>3= Evidence of a high degree of effectiveness<br>9 = No studies have been undertaken or there is insufficient evidence upon which to make a judgment |
|  | Risk of harm potential    | Whether the action had the potential to cause harm or damage based on available evidence    | None; possible                                                                                                                                                                                                                                                                                                                            |

**Table 2. Characteristics of Industry Actions to Reduce Harmful Drinking online compendium (n = 1046).**



|                                         | n (%)      |
|-----------------------------------------|------------|
| <b>Region<sup>a</sup></b>               |            |
| Africa                                  | 69 (6.6)   |
| Asia                                    | 63 (6.0)   |
| Europe                                  | 604 (57.7) |
| Latin America                           | 67 (6.4)   |
| North America                           | 163 (15.6) |
| Oceania                                 | 40 (3.8)   |
| International                           | 40 (3.8)   |
| <b>Country Income level<sup>b</sup></b> |            |
| High                                    | 797 (76.2) |
| Upper-middle                            | 127 (12.1) |
| Lower-middle                            | 59 (5.6)   |
| Low                                     | 22 (2.1)   |
| Multiple                                | 41 (3.9)   |
| <b>Year started<sup>c</sup></b>         |            |
| 1990-1999                               | 105 (10.4) |
| 2000-2009                               | 559 (55.3) |
| 2010-2014                               | 346 (34.2) |
| <b>Estimated Population reach</b>       |            |
| None                                    | 218 (20.8) |
| Small                                   | 499 (47.7) |
| Moderate                                | 218 (20.8) |
| Large                                   | 111 (10.6) |
| <b>Sponsor</b>                          |            |
| Producer                                | 537 (51.3) |
| SAPRO                                   | 306 (29.3) |
| Trade Association                       | 182 (17.4) |
| Other                                   | 21 (2.0)   |
| <b>Partner</b>                          |            |
| None reported                           | 509 (48.7) |
| Governmental                            | 64 (6.1)   |
| NGO/ University                         | 92 (8.8)   |
| SAPRO/ Trade Assoc.                     | 55 (5.3)   |
| Commercial                              | 65 (6.2)   |
| Multiple partner types                  | 170 (16.3) |
| 'Non specified collaborator'/ Other     | 91 (8.7)   |
| <b>Industry-reported Evaluation</b>     |            |
| None reported                           | 688 (65.7) |
| Does not meet min. criteria             | 92 (8.8)   |
| Process                                 | 217 (20.7) |
| Outcome                                 | 49 (4.7)   |

<sup>a</sup> Regions according to UNSD classifications.

<sup>b</sup> According to World Bank classifications

<sup>c</sup> N=1010 because of missing data

1  
2  
3  
4  
5  
6  
7  
8  
9  
10  
11  
12  
13  
14  
15  
16  
17  
18  
19  
20  
21  
22  
23  
24  
25  
26  
27  
28  
29  
30  
31  
32  
33  
34  
35  
36  
37  
38  
39  
40  
41  
42  
43  
44  
45  
46  
47

**Table 3. Percentages, Odds ratios and 95% CIs by region for marketing potential, potential policy impact and strategic CSR.**

| Region <sup>a</sup>     | Marketing Potential |                 |             | Policy Impact |                 |            | Strategic CSR Actions |                 |            |
|-------------------------|---------------------|-----------------|-------------|---------------|-----------------|------------|-----------------------|-----------------|------------|
|                         | %                   | OR <sup>b</sup> | 95% CI      | %             | OR <sup>b</sup> | 95% CI     | %                     | OR <sup>b</sup> | 95% CI     |
| Africa ( n = 69)        | 43.5                | 3.08            | 1.24, 7.64  | 29.0          | 2.46            | 1.41, 4.26 | 33.3                  | 2.45            | 1.45, 4.16 |
| Asia (n = 63)           | 15.9                | 0.50            | 0.25, 1.00  | 6.9           | 1.19            | 0.60, 2.34 | 20.6                  | 1.77            | 0.87, 3.61 |
| Europe (n = 604)        | 24.0                | 0.74            | 0.56, 0.97  | 13.9          | 0.79            | 0.56, 1.10 | 15.2                  | 0.64            | 0.47, 0.89 |
| LAC (n = 69)            | 53.7                | 4.65            | 1.87, 11.56 | 7.5           | 0.43            | 0.17, 1.09 | 22.4                  | 1.34            | 0.73, 2.44 |
| North America (n = 163) | 27.0                | 1.03            | 0.70, 1.50  | 10.4          | 0.6             | 0.35, 1.03 | 11.0                  | 0.52            | 0.31, 0.87 |
| Oceania (n = 40)        | 10.0                | 0.29            | 0.10, 0.84  | 27.5          | 2.19            | 1.07, 4.98 | 27.5                  | 1.77            | 0.87, 3.61 |
| International (n = 40)  | 33.3                | 0.68            | 0.31, 1.50  | 27.5          | 2.19            | 1.07, 4.98 | 40.0                  | 3.22            | 1.67, 6.19 |
| Totals (n=1046)         | 26.5                | .               | .           | 15.2          | .               | .          | 18.0                  | .               | .          |

<sup>a</sup>Regions based on UNSD classifications; <sup>b</sup> UN region compared to the rest of the world

**Table 4. Percentage, odds ratios and 95% CIs of actions rated as meeting WHO Global Strategy target areas and actions with potential for harm, by region (n = 1046)**

| Region <sup>a</sup>     | WHO Global Strategy target area met |                 |            | Potential for harm |                 |            |
|-------------------------|-------------------------------------|-----------------|------------|--------------------|-----------------|------------|
|                         | %                                   | OR <sup>b</sup> | 95% CI     | %                  | OR <sup>b</sup> | 95% CI     |
| Africa (n = 69)         | 39.1                                | 1.81            | 1.09, 2.99 | 7.2                | 0.61            | 0.24, 1.56 |
| Asia (n = 63)           | 23.8                                | 0.83            | 0.45, 1.51 | 15.9               | 1.57            | 0.77, 3.19 |
| Europe (n = 604)        | 24.8                                | 0.76            | 0.58, 1.01 | 9.6                | 0.71            | 0.48, 1.05 |
| LAC (n = 69)            | 32.8                                | 1.34            | 0.79, 2.28 | 25.4               | 3.05            | 1.69, 5.50 |
| North America (n = 163) | 38.7                                | 1.89            | 1.38, 2.69 | 6.1                | 0.48            | 0.24, 0.94 |
| Oceania (n = 40)        | 7.5                                 | 0.21            | 0.06, 0.68 | 27.5               | 3.29            | 1.59, 6.78 |
| International (n = 40)  | 10.0                                | 0.21            | 0.06, 0.68 | 10.0               | 0.89            | 0.31, 2.56 |

<sup>a</sup>Regions based on UNSD classifications; <sup>b</sup>UN region compared to the rest of the world

**Table 5. Activity type by level of effectiveness (n = 1046)**

| Activity Type (example)                                          | N   | Evidence of effectiveness |                  |
|------------------------------------------------------------------|-----|---------------------------|------------------|
|                                                                  |     | None/Unknown              | Limited-Moderate |
| Availability ( <i>MLPA, different availability by strength</i> ) | 7   | 0.0                       | 0.7              |
| Environment ( <i>RBS training</i> )                              | 49  | 4.0                       | 0.7              |
| Drink-Driving ( <i>designated driver campaigns, safe rides</i> ) | 49  | 4.6                       | 0.1              |
| Brief Intervention and Treatment                                 | 5   | 0.0                       | 0.5              |
| Marketing ( <i>self regulation codes</i> )                       | 67  | 6.2                       | 0.2              |
| Education and Persuasion                                         | 75  | 6.1                       | 1.1              |
| 'Other' ( <i>newsletters, industry-sponsored conferences, )</i>  | 794 | 75.9                      | 0.0              |

1  
2  
3  
4  
5  
6  
7  
8  
9  
10  
11  
12  
13  
14  
15  
16  
17  
18  
19  
20  
21  
22  
23  
24  
25  
26  
27  
28  
29  
30  
31  
32  
33  
34  
35  
36  
37  
38  
39  
40  
41  
42  
43  
44  
45  
46  
47  
48  
49  
50  
51  
52  
53  
54  
55  
56  
57  
58  
59  
60

---

|       |      |       |      |
|-------|------|-------|------|
| Total | 1046 | 96.8% | 3.2% |
|-------|------|-------|------|

---

For peer review only

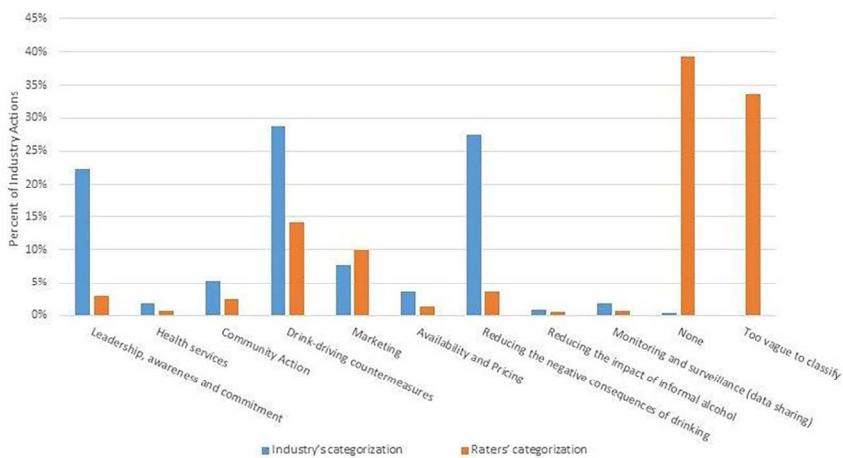

Figure 1. Percent of industry actions classified by IARD and by health professionals according to WHO Global Strategy target areas

156x90mm (300 x 300 DPI)

Review only
